# Supplementary material
Source: publisher figshare collection journal article supplement (https://gsapubs.figshare.com/ndownloader/files/23314400)
Supplement: Supplementary file 1 [file 23314400]

## Sheet: Sheet1
APPENDIX 3: LA-ICP-MS U-PB DETRITAL ZIRCON GEOCHRONOLOGY
		Isotope ratios									Apparent ages (Ma)
Carter 5.1 Wilhite Fm.	U	206Pb	U/Th	206Pb*	±1s	207Pb*	±1s	206Pb*	±1s	error	206Pb*	±	207Pb*	±	206Pb*	±	Best Age	±	Conc
	(ppm)	204Pb		207Pb*	(%)	235U*	(%)	238U	(%)	corr.	238U*	(Ma)	235U	(Ma)	207Pb*	(Ma)	(Ma)	(Ma)	(%)
CARTER5.1-43	72.9354	68789.4	1.9712	14.2466	2.87596	1.57296	3.00546	0.162527	0.872727	0.29038	970.806	7.86538	959.593	18.6584	933.99	59.0104	933.99	59.0104	103.942
CARTER5.1-53	86.1619	36707.5	1.36065	14.2116	1.65506	1.56504	2.06657	0.161312	1.23753	0.598835	964.064	11.0814	956.463	12.8036	939.001	33.9494	939.001	33.9494	102.669
CARTER5.1-16	44.1038	31120.4	1.47475	14.1639	3.96723	1.5803	4.11692	0.162339	1.10003	0.267197	969.76	9.904	962.487	25.6073	945.93	81.2509	945.93	81.2509	102.519
CARTER5.1-59	68.7028	34977.3	1.29798	14.115	1.70571	1.58915	2.04953	0.162683	1.13627	0.554408	971.672	10.249	965.965	12.7736	952.981	34.8856	952.981	34.8856	101.961
CARTER5.1-9	142.639	71497.4	2.24529	13.9366	0.670877	1.64297	2.50912	0.166068	2.41777	0.963592	990.411	22.1971	986.855	15.8389	978.939	13.6523	978.939	13.6523	101.172
CARTER5.1-46	36.6816	37056.4	0.894634	13.921	5.74087	1.63944	5.81726	0.165526	0.93969	0.161535	987.412	8.60294	985.499	36.7047	981.258	117.01	981.258	117.01	100.627
CARTER5.1-96	19.2246	15413.8	1.20831	13.7741	6.82514	1.73021	8.0128	0.172847	4.1979	0.5239	1027.78	39.8819	1019.83	51.6048	1002.78	138.702	1002.78	138.702	102.492
CARTER5.1-84	114.175	141528	2.15214	13.7681	0.982469	1.65091	1.25697	0.164852	0.78405	0.623761	983.687	7.15298	989.899	7.94864	1003.68	19.9401	1003.68	19.9401	98.0084
CARTER5.1-82	85.1626	60904	2.79278	13.7216	1.27588	1.72951	1.47712	0.172119	0.744315	0.503897	1023.77	7.04582	1019.57	9.50377	1010.53	25.8699	1010.53	25.8699	101.31
CARTER5.1-85	73.1058	68931.6	2.13086	13.6986	1.95193	1.74521	2.26265	0.17339	1.14435	0.505759	1030.76	10.9008	1025.39	14.6066	1013.93	39.5596	1013.93	39.5596	101.66
CARTER5.1-58	137.08	83470.1	2.23752	13.6943	0.9409	1.70822	1.26174	0.169662	0.840645	0.666261	1010.25	7.86059	1011.62	8.08105	1014.57	19.0665	1014.57	19.0665	99.574
CARTER5.1-44	100.591	51524.6	2.46268	13.6466	1.27694	1.75466	1.58793	0.173667	0.943906	0.594424	1032.28	9.00366	1028.88	10.2708	1021.64	25.8582	1021.64	25.8582	101.041
CARTER5.1-11	124.454	168381	1.53434	13.6309	1.05623	1.65977	1.37571	0.164085	0.881451	0.640726	979.438	8.00941	993.286	8.71705	1023.98	21.3921	1023.98	21.3921	95.6503
CARTER5.1-66	21.8781	13535.6	1.28887	13.6302	7.43879	1.74404	8.24559	0.172408	3.55726	0.431414	1025.37	33.7224	1024.96	53.2618	1024.07	150.715	1024.07	150.715	100.127
CARTER5.1-111	509.858	304067	2.19422	13.6209	0.300778	1.75767	1.07354	0.173637	1.03055	0.959949	1032.12	9.82867	1029.99	6.94787	1025.46	6.08472	1025.46	6.08472	100.65
CARTER5.1-70	16.6666	25111.9	1.54016	13.5449	7.85285	1.67426	8.10002	0.164474	1.98573	0.245152	981.593	18.0804	998.806	51.5357	1036.77	158.805	1036.77	158.805	94.6783
CARTER5.1-30	215.601	285006	2.54879	13.5166	0.613577	1.79345	0.828294	0.175815	0.556411	0.671756	1044.07	5.36328	1043.08	5.39966	1040.98	12.4023	1040.98	12.4023	100.297
CARTER5.1-97	58.5382	48944.5	2.27593	13.5095	2.03674	1.79243	2.28896	0.175622	1.04451	0.456327	1043.01	10.0588	1042.71	14.9197	1042.05	41.1035	1042.05	41.1035	100.092
CARTER5.1-104	67.75	65896.6	2.68761	13.4971	2.99331	1.79983	3.21658	0.176185	1.17747	0.366063	1046.1	11.3701	1045.4	20.9984	1043.91	60.3851	1043.91	60.3851	100.21
CARTER5.1-8	27.0919	12778.9	1.46883	13.4925	4.22621	1.77567	4.55605	0.173761	1.70199	0.373567	1032.8	16.2424	1036.6	29.603	1044.59	85.285	1044.59	85.285	98.8718
CARTER5.1-119	156.666	98684.6	2.46538	13.4847	1.18863	1.82979	1.52737	0.178954	0.959174	0.62799	1061.26	9.38556	1056.2	10.0285	1045.79	23.9927	1045.79	23.9927	101.479
CARTER5.1-63	39.2771	27726.2	0.606067	13.4651	2.95954	1.78756	3.42855	0.17457	1.7309	0.504851	1037.24	16.5838	1040.94	22.3278	1048.72	59.6745	1048.72	59.6745	98.9056
CARTER5.1-29	92.9078	86794.6	2.01659	13.4512	1.95682	1.78062	4.05229	0.173712	3.54851	0.87568	1032.53	33.8561	1038.41	26.3547	1050.81	39.4392	1050.81	39.4392	98.2607
CARTER5.1-88	115.941	103432	2.09745	13.4184	1.21733	1.86778	2.53698	0.181771	2.22584	0.877359	1076.64	22.0701	1069.75	16.779	1055.73	24.5345	1055.73	24.5345	101.981
CARTER5.1-54	128.661	166922	1.56174	13.4147	1.53526	1.86356	1.90431	0.181311	1.12666	0.591637	1074.13	11.1474	1068.25	12.5843	1056.28	30.9163	1056.28	30.9163	101.691
CARTER5.1-6	351.399	352389	9.5827	13.4092	0.463389	1.81267	0.975147	0.176287	0.858011	0.879878	1046.66	8.28931	1050.04	6.38124	1057.1	9.33038	1057.1	9.33038	99.012
CARTER5.1-122	149.617	90675.7	1.70893	13.3837	1.29211	1.87997	1.45356	0.182484	0.665807	0.458052	1080.53	6.62363	1074.05	9.63472	1060.94	26.0132	1060.94	26.0132	101.847
CARTER5.1-39	14.5437	7991.7	0.698197	13.3502	5.42781	1.86426	5.75692	0.180506	1.91861	0.33327	1069.74	18.9117	1068.5	38.0643	1065.98	109.231	1065.98	109.231	100.353
CARTER5.1-55	65.0401	39016.1	1.2177	13.3413	3.14027	1.83562	3.45595	0.177616	1.443	0.417541	1053.93	14.0301	1058.3	22.7198	1067.32	63.163	1067.32	63.163	98.7461
CARTER5.1-40	60.1018	18936.2	0.298542	13.3014	2.14245	1.89585	2.44161	0.182894	1.17105	0.479623	1082.77	11.6721	1079.64	16.232	1073.34	43.0543	1073.34	43.0543	100.878
CARTER5.1-123	53.8262	25818.2	2.07686	13.3004	4.51969	1.82274	4.58176	0.175828	0.751636	0.16405	1044.14	7.24553	1053.67	30.0499	1073.49	90.816	1073.49	90.816	97.2666
CARTER5.1-86	75.4697	45538.2	1.4879	13.2901	1.42799	1.88372	1.59609	0.181569	0.712981	0.446706	1075.54	7.06285	1075.37	10.5868	1075.05	28.6745	1075.05	28.6745	100.046
CARTER5.1-52	25.275	13416.1	0.986797	13.284	4.64796	1.75643	5.5081	0.169223	2.9556	0.536591	1007.83	27.5757	1029.53	35.6528	1075.97	93.3818	1075.97	93.3818	93.6669
CARTER5.1-13	154.059	155231	1.83842	13.2825	0.577264	1.91455	0.80054	0.184437	0.554644	0.692838	1091.17	5.5676	1086.17	5.33964	1076.19	11.5896	1076.19	11.5896	101.392
CARTER5.1-41	85.9474	49647.3	0.987525	13.2543	1.16189	1.91539	2.92536	0.184125	2.68473	0.917742	1089.47	26.9114	1086.46	19.5175	1080.45	23.3119	1080.45	23.3119	100.835
CARTER5.1-76	22.6914	26421.7	2.21455	13.2469	6.21743	1.88773	6.97865	0.181364	3.16942	0.454159	1074.42	31.3667	1076.78	46.3539	1081.56	124.855	1081.56	124.855	99.3397
CARTER5.1-67	22.226	13026.5	2.23598	13.237	3.47128	1.97248	5.14894	0.189366	3.80287	0.738573	1117.94	39.032	1106.15	34.7065	1083.04	69.6394	1083.04	69.6394	103.223
CARTER5.1-61	243.54	250022	1.21038	13.0555	1.31245	1.95577	3.11431	0.185187	2.82426	0.906863	1095.25	28.4478	1100.43	20.9267	1110.67	26.2153	1110.67	26.2153	98.6115
CARTER5.1-49	96.5603	84075.7	3.64019	13.0536	1.46858	2.05239	2.42758	0.194307	1.93299	0.79626	1144.66	20.2731	1133.09	16.5753	1110.97	29.3246	1110.97	29.3246	103.033
CARTER5.1-19	27.6021	17671.3	1.13001	13.0127	3.12216	2.04605	3.66496	0.193101	1.91938	0.523712	1138.15	20.0258	1130.98	25.0015	1117.26	62.3133	1117.26	62.3133	101.87
CARTER5.1-102	22.3025	14535.4	1.43566	12.9981	4.65646	2.10299	5.95798	0.198251	3.71684	0.623842	1165.92	39.6429	1149.79	41.0225	1119.51	92.9455	1119.51	92.9455	104.146
CARTER5.1-75	84.0235	72645.3	2.00442	12.9113	1.28148	2.04796	2.67611	0.191775	2.34934	0.877892	1130.98	24.3704	1131.62	18.2597	1132.85	25.5093	1132.85	25.5093	99.8352
CARTER5.1-56	361.937	363231	1.9633	12.894	0.609116	2.0145	1.19025	0.188388	1.02258	0.85913	1112.64	10.4498	1120.41	8.07659	1135.5	12.1302	1135.5	12.1302	97.9869
CARTER5.1-15	47.6914	51487.1	2.34326	12.8872	1.61769	2.0873	2.35314	0.195093	1.7089	0.726223	1148.91	17.9836	1144.64	16.1555	1136.57	32.1903	1136.57	32.1903	101.085
CARTER5.1-110	218.809	119992	1.89607	12.8473	0.485833	2.08878	0.755959	0.194627	0.579171	0.766141	1146.39	6.08271	1145.13	5.19084	1142.73	9.65014	1142.73	9.65014	100.321
CARTER5.1-71	63.9813	47142	2.67186	12.8246	1.80914	2.11443	2.23515	0.196669	1.31259	0.587248	1157.4	13.9062	1153.52	15.4093	1146.25	35.9672	1146.25	35.9672	100.973
CARTER5.1-17	236.944	121955	4.31839	12.8179	0.855531	2.06626	1.2194	0.192087	0.868903	0.712569	1132.67	9.02569	1137.69	8.34373	1147.27	16.9897	1147.27	16.9897	98.7279
CARTER5.1-114	83.1785	30600.9	2.58927	12.802	1.27902	2.11913	1.58239	0.196759	0.931708	0.588798	1157.89	9.87476	1155.05	10.9165	1149.75	25.4008	1149.75	25.4008	100.708
CARTER5.1-50	117.294	68860.5	3.31873	12.7942	1.19881	2.09363	1.33032	0.194272	0.576717	0.433517	1144.48	6.04768	1146.72	9.14177	1150.94	23.8218	1150.94	23.8218	99.4381
CARTER5.1-107	91.1882	67383.3	1.93892	12.7875	1.31756	2.11785	1.47251	0.196417	0.657515	0.446526	1156.04	6.95858	1154.64	10.1565	1151.97	26.1666	1151.97	26.1666	100.353
CARTER5.1-65	74.2508	32247.1	1.45758	12.7872	1.85003	2.07744	2.37715	0.192665	1.49273	0.627951	1135.79	15.5448	1141.39	16.2953	1152.02	36.748	1152.02	36.748	98.5914
CARTER5.1-10	59.1633	45260.1	2.46614	12.7743	1.69487	2.20548	2.0378	0.204334	1.13139	0.555202	1198.56	12.3744	1182.78	14.2374	1154.02	33.6381	1154.02	33.6381	103.859
CARTER5.1-108	59.6701	46600.3	4.62348	12.774	2.5618	2.18681	2.99158	0.202598	1.54491	0.516419	1189.26	16.7779	1176.85	20.8471	1154.08	50.8487	1154.08	50.8487	103.049
CARTER5.1-94	122.186	70198.9	1.87546	12.7694	0.995088	2.15338	1.17076	0.19943	0.616828	0.526862	1172.26	6.61146	1166.14	8.11804	1154.79	19.7658	1154.79	19.7658	101.513
CARTER5.1-42	89.7999	26991.6	2.03218	12.7551	1.58579	2.13968	1.69869	0.197939	0.608942	0.358477	1164.24	6.48619	1161.72	11.7551	1157.02	31.4656	1157.02	31.4656	100.624
CARTER5.1-100	230.049	437217	1.9368	12.7531	0.517338	2.13166	0.755482	0.197166	0.550559	0.728751	1160.08	5.8452	1159.13	5.22158	1157.32	10.2556	1157.32	10.2556	100.238
CARTER5.1-32	124.653	36096.7	2.77427	12.738	0.759324	2.16499	0.902011	0.200013	0.486878	0.53977	1175.39	5.23132	1169.87	6.26514	1159.66	15.0764	1159.66	15.0764	101.356
CARTER5.1-27	206.23	148668	2.17525	12.7189	1.01442	2.12296	1.15855	0.195835	0.55963	0.483045	1152.91	5.90798	1156.3	7.99702	1162.64	20.1072	1162.64	20.1072	99.1629
CARTER5.1-89	94.1118	48930.1	2.08061	12.7178	0.996283	2.14322	1.37642	0.197686	0.949712	0.689987	1162.88	10.1052	1162.86	9.52984	1162.82	19.7638	1162.82	19.7638	100.006
CARTER5.1-120	65.106	44014	1.95177	12.7023	1.96316	2.14902	2.19196	0.19798	0.975038	0.444825	1164.46	10.3875	1164.74	15.1901	1165.24	38.9007	1165.24	38.9007	99.9331
CARTER5.1-78	60.7428	57005	1.44107	12.7016	1.88639	2.14335	2.66919	0.197448	1.88842	0.707486	1161.59	20.073	1162.91	18.4824	1165.34	37.3597	1165.34	37.3597	99.6788
CARTER5.1-3	77.1289	67736.4	1.91193	12.7009	1.92039	2.17397	2.18836	0.200256	1.0493	0.479492	1176.7	11.2857	1172.75	15.2206	1165.45	38.0517	1165.45	38.0517	100.965
CARTER5.1-62	112.661	102018	1.8097	12.6986	1.0223	2.16957	1.76032	0.199816	1.43305	0.814083	1174.33	15.3849	1171.34	12.2354	1165.8	20.2544	1165.8	20.2544	100.731
CARTER5.1-81	174.463	130072	2.55318	12.6889	0.647687	2.1761	0.821158	0.200264	0.504778	0.614715	1176.74	5.42932	1173.43	5.71276	1167.32	12.8471	1167.32	12.8471	100.807
CARTER5.1-2	256.057	300898	2.72775	12.673	0.408757	2.1784	0.816877	0.200224	0.707253	0.8658	1176.52	7.60582	1174.17	5.68487	1169.8	8.11301	1169.8	8.11301	100.574
CARTER5.1-101	72.5946	69707.1	1.71784	12.6727	1.404	2.17589	1.69068	0.199989	0.941896	0.557112	1175.26	10.1193	1173.36	11.762	1169.85	27.8016	1169.85	27.8016	100.462
CARTER5.1-4	145.464	171159	3.37018	12.6626	0.736225	2.15807	0.899715	0.198194	0.517164	0.574809	1165.61	5.51454	1167.65	6.24287	1171.46	14.5929	1171.46	14.5929	99.5003
CARTER5.1-5	85.8245	43605.5	0.649642	12.6454	1.87332	2.18425	2.14665	0.200325	1.04823	0.488307	1177.06	11.2774	1176.03	14.9526	1174.15	37.054	1174.15	37.054	100.248
CARTER5.1-45	170.131	136832	3.57289	12.6347	0.799113	2.17924	0.990863	0.199696	0.585856	0.591259	1173.69	6.28648	1174.43	6.89654	1175.83	15.8161	1175.83	15.8161	99.818
CARTER5.1-1	143.38	144582	2.03808	12.6309	0.714715	2.20838	0.887527	0.202305	0.526199	0.592883	1187.69	5.70769	1183.7	6.20304	1176.43	14.1384	1176.43	14.1384	100.957
CARTER5.1-87	212.321	32932.8	1.93212	12.5952	0.466134	2.18368	0.927942	0.199476	0.802369	0.864676	1172.51	8.60186	1175.85	6.46273	1182.03	9.19438	1182.03	9.19438	99.1942
CARTER5.1-21	25.4173	15929.4	1.03937	12.59	4.81965	2.11468	5.09383	0.193094	1.64867	0.323659	1138.11	17.2007	1153.6	35.13	1182.84	95.2847	1182.84	95.2847	96.2188
CARTER5.1-47	264.53	101676	2.13595	12.5852	0.517989	2.2122	0.776636	0.201923	0.578664	0.74509	1185.64	6.26691	1184.91	5.43092	1183.59	10.233	1183.59	10.233	100.173
CARTER5.1-35	62.0358	57057.1	2.30237	12.5832	1.8367	2.14488	1.9065	0.195747	0.511161	0.268115	1152.43	5.39426	1163.4	13.2035	1183.91	36.2915	1183.91	36.2915	97.3414
CARTER5.1-112	78.0641	73146.7	2.4041	12.553	1.59768	2.24955	1.82994	0.204805	0.89224	0.487579	1201.08	9.77743	1196.64	12.8636	1188.66	31.5508	1188.66	31.5508	101.046
CARTER5.1-37	107.1	4644.51	1.6926	12.4551	4.58257	2.07594	4.7723	0.187526	1.33225	0.279163	1107.96	13.5619	1140.89	32.7148	1204.06	90.3319	1204.06	90.3319	92.0185
CARTER5.1-31	68.0033	88889.1	1.26803	12.3974	1.88091	2.21762	1.99449	0.199396	0.663453	0.332643	1172.08	7.11021	1186.62	13.9586	1213.22	37.0005	1213.22	37.0005	96.6087
CARTER5.1-23	54.7549	93127	1.20608	12.1953	2.03389	2.30095	2.13227	0.203516	0.64022	0.300253	1194.18	6.97903	1212.58	15.0929	1245.46	39.8379	1245.46	39.8379	95.8826
CARTER5.1-12	57.3822	92451.2	2.21584	12.142	2.64592	2.38309	2.82009	0.20986	0.975708	0.345985	1228.07	10.9102	1237.54	20.1733	1254.05	51.7472	1254.05	51.7472	97.9286
CARTER5.1-124	244.685	162571	4.62413	12.0678	0.470194	2.52	0.804281	0.220559	0.652522	0.811312	1284.83	7.60117	1277.82	5.84656	1266.03	9.16464	1266.03	9.16464	101.485
CARTER5.1-38	148.076	121166	2.43659	11.657	0.649788	2.70161	1.0795	0.228407	0.862032	0.798546	1326.14	10.3326	1328.9	8.00008	1333.33	12.5691	1333.33	12.5691	99.4608
CARTER5.1-103	208.923	520771	1.76428	11.6355	0.408486	2.73862	1.31147	0.231109	1.24623	0.950255	1340.31	15.0813	1339	9.75487	1336.9	7.89735	1336.9	7.89735	100.255
CARTER5.1-28	38.7942	58549	4.93787	11.4061	1.92436	2.81565	2.44647	0.232923	1.51065	0.617482	1349.8	18.3975	1359.71	18.3327	1375.31	37.0093	1375.31	37.0093	98.1454
CARTER5.1-121	33.7299	44367.9	3.57166	11.3206	2.70921	2.90352	3.03976	0.238393	1.37853	0.453499	1378.34	17.1069	1382.83	22.9621	1389.75	52.0046	1389.75	52.0046	99.1792
CARTER5.1-64	33.7967	31227.9	1.24659	11.2796	1.94251	3.09506	2.49751	0.253199	1.56979	0.628541	1454.95	20.4458	1431.47	19.1689	1396.71	37.2484	1396.71	37.2484	104.17
CARTER5.1-26	172.933	178962	0.742683	11.0018	0.550962	3.13737	1.39178	0.25034	1.27808	0.918307	1440.23	16.496	1441.91	10.7166	1444.36	10.4956	1444.36	10.4956	99.7139
CARTER5.1-118	71.4615	57522.9	1.64016	10.9583	0.581226	3.1769	2.35714	0.252491	2.28436	0.969122	1451.31	29.6864	1451.56	18.2059	1451.91	11.0609	1451.91	11.0609	99.9589
CARTER5.1-57	400.532	80465.8	2.32685	10.896	0.252108	3.15151	1.26684	0.249049	1.2415	0.979998	1433.57	15.9577	1445.37	9.7651	1462.75	4.79063	1462.75	4.79063	98.0048
CARTER5.1-51	108.326	107118	2.14577	10.8933	0.556481	3.24161	1.10415	0.256104	0.953669	0.86371	1469.88	12.5345	1467.17	8.5684	1463.23	10.5738	1463.23	10.5738	100.454
CARTER5.1-34	110.471	70570.9	1.72023	10.8852	1.13041	3.18238	1.3049	0.25124	0.651869	0.499555	1444.87	8.43775	1452.89	10.0821	1464.63	21.4756	1464.63	21.4756	98.6505
CARTER5.1-109	115.928	217079	2.05973	10.8836	0.716066	3.23106	0.818459	0.255046	0.39639	0.484313	1464.45	5.19278	1464.64	6.34641	1464.91	13.6031	1464.91	13.6031	99.9684
CARTER5.1-72	58.2081	40669.2	1.27178	10.7915	1.2875	3.30579	2.53639	0.258736	2.18531	0.861586	1483.37	28.9572	1482.42	19.7753	1481.04	24.4065	1481.04	24.4065	100.157
CARTER5.1-74	93.6485	26245.8	0.956678	9.90975	0.546426	3.97456	1.06354	0.285661	0.91244	0.857923	1619.81	13.0692	1629.02	8.62841	1640.91	10.143	1640.91	10.143	98.7141
WCK12-1 Sandsuck Fm.	U	206Pb	U/Th	206Pb*	±	207Pb*	±	206Pb*	±	error	206Pb*	±	207Pb*	±	206Pb*	±	Best age	±	Conc
	(ppm)	204Pb		207Pb*	(%)	235U*	(%)	238U	(%)	corr.	238U*	(Ma)	235U	(Ma)	207Pb*	(Ma)	(Ma)	(Ma)	(%)
WCK12-1-91	220.932	134168	1.44472	15.9012	0.914711	0.987586	1.19211	0.113895	0.764486	0.641286	695.327	5.03903	697.488	6.01453	704.44	19.4445	695.327	5.03903	98.7064
WCK12-1-115	37.7145	25582.3	1.85895	14.1638	4.893	1.61651	5.25697	0.166057	1.92205	0.365619	990.349	17.645	976.637	32.9893	945.941	100.253	945.941	100.253	104.695
WCK12-1-4	238.192	77246.3	1.03425	14.0957	0.707961	1.56844	1.06132	0.160344	0.790697	0.745009	958.688	7.0436	957.808	6.58086	955.768	14.4604	955.768	14.4604	100.306
WCK12-1-102	142.285	66298.6	2.15812	13.8156	1.80246	1.69663	2.11935	0.170002	1.1148	0.526009	1012.12	10.442	1007.26	13.5402	996.708	36.6068	996.708	36.6068	101.547
WCK12-1-50	90.1469	79767.7	2.41278	13.8007	1.41866	1.66496	1.78363	0.166649	1.0811	0.60612	993.621	9.9551	995.267	11.3153	998.876	28.8022	998.876	28.8022	99.4739
WCK12-1-45	41.5712	31747.8	0.953132	13.7918	3.20732	1.72907	3.95846	0.172954	2.32003	0.586094	1028.37	22.0528	1019.4	25.4709	1000.18	65.1678	1000.18	65.1678	102.818
WCK12-1-87	57.5226	37745	2.70759	13.7917	2.39007	1.72161	2.46156	0.172207	0.588956	0.239261	1024.26	5.5776	1016.63	15.8119	1000.2	48.557	1000.2	48.557	102.405
WCK12-1-41	191.974	111196	2.74817	13.7603	0.641604	1.71552	1.2308	0.171207	1.05034	0.85338	1018.76	9.89776	1014.35	7.89531	1004.82	13.0118	1004.82	13.0118	101.387
WCK12-1-28	72.8183	34701.7	3.22409	13.6979	2.92922	1.75093	3.02295	0.173948	0.746914	0.247081	1033.83	7.13445	1027.51	19.5391	1014.05	59.3916	1014.05	59.3916	101.951
WCK12-1-69	85.529	45146.5	1.8786	13.6366	2.26445	1.77753	2.41085	0.175802	0.827304	0.343159	1044	7.97393	1037.28	15.6672	1023.12	45.843	1023.12	45.843	102.041
WCK12-1-111	162.082	110020	3.03737	13.6208	1.12072	1.78373	2.25908	0.17621	1.96148	0.868267	1046.24	18.9431	1039.54	14.6992	1025.47	22.6915	1025.47	22.6915	102.026
WCK12-1-106	104.115	105629	1.34845	13.6154	1.44234	1.7223	1.88905	0.170074	1.21989	0.645772	1012.52	11.4305	1016.88	12.1357	1026.28	29.1951	1026.28	29.1951	98.6595
WCK12-1-103	203.867	150041	3.83138	13.5888	0.693867	1.75892	2.42039	0.17335	2.3188	0.958028	1030.54	22.0841	1030.45	15.6696	1030.23	14.0268	1030.23	14.0268	100.03
WCK12-1-105	81.9264	41245.1	17.6734	13.5311	1.98723	1.7559	2.22586	0.172319	1.00269	0.450474	1024.88	9.50109	1029.34	14.401	1038.82	40.1428	1038.82	40.1428	98.658
WCK12-1-6	39.0776	19840.2	4.02174	13.5223	2.81396	1.80144	2.92164	0.176672	0.785889	0.268989	1048.77	7.60662	1045.98	19.0786	1040.14	56.8004	1040.14	56.8004	100.83
WCK12-1-99	280.354	165124	3.8702	13.4774	0.563758	1.81486	1.14888	0.177398	1.00105	0.871327	1052.75	9.72299	1050.83	7.52139	1046.88	11.3871	1046.88	11.3871	100.56
WCK12-1-29	301.701	176570	1.6692	13.467	0.506258	1.81087	1.07599	0.176871	0.94945	0.882398	1049.86	9.19851	1049.39	7.03868	1048.45	10.2244	1048.45	10.2244	100.135
WCK12-1-101	94.3417	120118	2.30462	13.4598	1.63274	1.80272	1.73777	0.175981	0.594975	0.342379	1044.98	5.7396	1046.44	11.3498	1049.53	32.9207	1049.53	32.9207	99.5669
WCK12-1-121	680.167	56722.8	5.59318	13.4438	0.59255	1.84169	1.61354	0.179572	1.5008	0.930128	1064.64	14.7284	1060.47	10.6186	1051.91	11.9584	1051.91	11.9584	101.21
WCK12-1-65	128.939	71243.5	2.07054	13.4379	1.21036	1.80204	2.60394	0.175628	2.30555	0.885406	1043.05	22.2033	1046.2	17.0056	1052.8	24.4045	1052.8	24.4045	99.0736
WCK12-1-120	90.7646	63682.3	2.94104	13.4254	1.35544	1.80688	1.58582	0.175936	0.823167	0.519079	1044.74	7.93922	1047.95	10.3658	1054.67	27.3109	1054.67	27.3109	99.0579
WCK12-1-114	143.352	82017	1.67035	13.4093	1.54679	1.86601	1.80092	0.181476	0.92236	0.51216	1075.03	9.13299	1069.12	11.9064	1057.1	31.1637	1057.1	31.1637	101.697
WCK12-1-71	90.4299	46353.3	1.70022	13.3605	1.64223	1.83641	1.8725	0.177948	0.899631	0.480443	1055.75	8.76091	1058.58	12.3105	1064.42	33.04	1064.42	33.04	99.1855
WCK12-1-82	417.394	308578	3.52581	13.2122	0.42989	1.92865	0.980068	0.184811	0.880754	0.898666	1093.21	8.8563	1091.07	6.55357	1086.83	8.63049	1086.83	8.63049	100.587
WCK12-1-75	38.5566	21446.8	1.63826	13.1781	5.13182	2.02238	5.28565	0.193293	1.26591	0.239499	1139.19	13.2187	1123.06	35.9272	1091.98	102.83	1091.98	102.83	104.324
WCK12-1-100	26.1622	37677.8	1.04336	13.1589	5.70399	1.86512	6.14915	0.178002	2.29708	0.373561	1056.05	22.3756	1068.8	40.6669	1094.94	114.265	1094.94	114.265	96.4479
WCK12-1-74	68.1892	40423.6	1.02883	13.1552	2.05906	1.89244	2.38367	0.180558	1.2009	0.5038	1070.02	11.8401	1078.44	15.8369	1095.5	41.224	1095.5	41.224	97.6743
WCK12-1-117	34.4599	23576.7	0.886673	13.1551	3.32983	1.94085	3.67603	0.185175	1.55737	0.423656	1095.19	15.686	1095.29	24.6384	1095.52	66.6756	1095.52	66.6756	99.9694
WCK12-1-86	254.399	80047	1.6638	13.1356	0.600747	1.95098	1.0179	0.185866	0.821726	0.807272	1098.94	8.30252	1098.78	6.83329	1098.49	12.0199	1098.49	12.0199	100.041
WCK12-1-5	29.632	27967.6	2.92313	13.069	4.19982	2.06175	4.78449	0.195423	2.29191	0.479029	1150.69	24.1531	1136.2	32.7252	1108.61	83.9456	1108.61	83.9456	103.795
WCK12-1-106	34.8082	20669.2	1.65608	13.0602	6.6218	2.08964	6.67391	0.197933	0.83239	0.124723	1164.21	8.86608	1145.41	45.8637	1109.96	132.412	1109.96	132.412	104.887
WCK12-1-83	119.927	75146.9	0.879492	13.0047	0.909362	2.02051	1.27198	0.190573	0.889377	0.699207	1124.48	9.17717	1122.43	8.63975	1118.49	18.151	1118.49	18.151	100.535
WCK12-1-3	96.2221	57980.8	1.40402	12.9478	1.51559	2.02979	3.84512	0.19061	3.53383	0.919042	1124.68	36.4708	1125.54	26.1622	1127.19	30.1906	1127.19	30.1906	99.7771
WCK12-1-88	35.4875	31193.2	1.62997	12.9272	3.17198	2.1055	3.53939	0.197405	1.5703	0.443664	1161.37	16.6886	1150.61	24.3706	1130.38	63.1665	1130.38	63.1665	102.741
WCK12-1-80	34.262	34651.6	2.24511	12.8539	4.17283	2.10668	4.43096	0.196396	1.49026	0.336329	1155.93	15.7703	1150.99	30.5183	1141.72	82.9799	1141.72	82.9799	101.245
WCK12-1-79	110.612	71285	1.73955	12.798	0.708535	2.14531	2.23069	0.199127	2.11517	0.948215	1170.63	22.6428	1163.54	15.45	1150.39	14.0506	1150.39	14.0506	101.759
WCK12-1-47	106.197	52603.6	2.64876	12.787	1.3699	2.14556	2.03513	0.198979	1.50503	0.739527	1169.83	16.1013	1163.62	14.0959	1152.05	27.2087	1152.05	27.2087	101.543
WCK12-1-33	112.702	69234.5	2.91996	12.6972	1.0824	2.17754	1.25748	0.200526	0.640047	0.508992	1178.14	6.89174	1173.89	8.75016	1166.04	21.4633	1166.04	21.4633	101.038
WCK12-1-55	67.8857	62493	1.02716	12.6359	1.79066	2.20581	2.66654	0.20215	1.97584	0.740976	1186.86	21.4184	1182.89	18.6319	1175.64	35.4292	1175.64	35.4292	100.954
WCK12-1-70	89.1628	95227	1.11732	12.6232	1.94893	2.16844	2.47556	0.198525	1.52646	0.616612	1167.39	16.2994	1170.98	17.2047	1177.64	38.5586	1177.64	38.5586	99.1295
WCK12-1-20	89.9029	77747.9	1.51529	12.6147	1.41507	2.22852	2.07157	0.203888	1.51294	0.730333	1196.17	16.5176	1190.05	14.5202	1178.97	27.9963	1178.97	27.9963	101.46
WCK12-1-12	39.9067	40650.8	3.40031	12.6068	2.98258	2.19381	3.77654	0.200587	2.31657	0.613409	1178.47	24.9502	1179.08	26.3458	1180.2	58.9745	1180.2	58.9745	99.8536
WCK12-1-66	116.07	97120.7	1.95713	12.5904	1.49651	2.16682	1.83686	0.197861	1.06514	0.579868	1163.82	11.3417	1170.46	12.7623	1182.78	29.5906	1182.78	29.5906	98.3964
WCK12-1-62	173.45	40625.9	2.00831	12.5871	0.822012	2.09991	1.11285	0.191701	0.750156	0.674085	1130.59	7.77908	1148.78	7.65468	1183.3	16.254	1183.3	16.254	95.5454
WCK12-1-30	30.7421	30816.1	1.89907	12.5243	3.66526	2.19362	4.11205	0.199258	1.86409	0.453324	1171.33	19.9659	1179.02	28.6868	1193.17	72.3503	1193.17	72.3503	98.1697
WCK12-1-126	125.885	143562	1.17522	12.5223	0.583107	2.24631	0.879598	0.204011	0.658543	0.748686	1196.83	7.19325	1195.63	6.18015	1193.45	11.4868	1193.45	11.4868	100.283
WCK12-1-68	18.645	10166.6	2.2622	12.5055	7.1921	2.30618	7.61079	0.209167	2.48954	0.327107	1224.38	27.7618	1214.19	53.9554	1196.1	142.021	1196.1	142.021	102.365
WCK12-1-72	34.4651	21621.1	2.79602	12.4696	2.22582	2.33118	2.34349	0.210827	0.733267	0.312895	1233.22	8.23047	1221.84	16.6537	1201.81	43.8912	1201.81	43.8912	102.613
WCK12-1-2	24.9836	26895.4	1.0614	12.463	4.82439	2.00903	5.1166	0.181596	1.70436	0.333104	1075.69	16.8857	1118.56	34.7009	1202.84	95.1204	1202.84	95.1204	89.4291
WCK12-1-51	64.9378	69636.6	2.56462	12.4292	2.80812	2.22729	3.64326	0.200779	2.32117	0.637113	1179.5	25.0197	1189.67	25.5359	1208.2	55.3224	1208.2	55.3224	97.6251
WCK12-1-35	98.3989	64057.2	1.69511	12.3383	0.699406	2.34834	1.22071	0.210144	1.00048	0.81959	1229.58	11.1997	1227.06	8.69329	1222.6	13.7425	1222.6	13.7425	100.572
WCK12-1-78	117.563	122114	0.790581	12.3293	0.925325	2.37121	5.06674	0.212034	4.98153	0.983182	1239.65	56.1802	1233.97	36.2015	1224.04	18.1865	1224.04	18.1865	101.275
WCK12-1-94	101.644	36408.1	1.71353	12.2564	2.19471	2.43572	6.61912	0.216516	6.24468	0.94343	1263.44	71.6503	1253.21	47.6825	1235.71	43.0298	1235.71	43.0298	102.244
WCK12-1-54	22.6706	13711.7	3.56091	12.2223	6.73643	2.51623	7.15521	0.22305	2.41194	0.337089	1297.97	28.3561	1276.73	52.0361	1241.13	132.161	1241.13	132.161	104.58
WCK12-1-11	46.3771	56920	1.44979	12.2038	2.38373	2.37391	2.53403	0.210116	0.859759	0.339285	1229.44	9.62339	1234.78	18.1059	1244.14	46.6825	1244.14	46.6825	98.8186
WCK12-1-1	87.0167	55714.9	1.75956	12.2006	0.924391	2.42527	1.12328	0.214605	0.638165	0.568128	1253.31	7.2687	1250.12	8.07591	1244.62	18.1253	1244.62	18.1253	100.698
WCK12-1-76	523.149	21215.6	2.26071	12.1283	1.24997	2.17814	3.90444	0.191595	3.69895	0.94737	1130.01	38.3404	1174.08	27.1772	1256.29	24.4258	1256.29	24.4258	89.948
WCK12-1-42	18.0508	11062.8	1.85795	12.1283	3.7555	2.48032	3.98837	0.218175	1.34287	0.336697	1272.23	15.5042	1266.31	28.8689	1256.29	73.4456	1256.29	73.4456	101.268
WCK12-1-59	61.798	50937.7	3.26814	12.0911	1.67301	2.31093	2.64088	0.202652	2.04335	0.773739	1189.55	22.1959	1215.65	18.7182	1262.26	32.671	1262.26	32.671	94.2395
WCK12-1-81	132.882	136411	1.54048	11.9526	1.04259	2.57228	1.5437	0.222986	1.13843	0.737466	1297.64	13.3808	1292.79	11.2871	1284.73	20.2956	1284.73	20.2956	101.005
WCK12-1-39	11.4452	6379.74	0.874648	11.8684	6.96476	2.62753	7.24191	0.226172	1.98429	0.274001	1314.4	23.5946	1308.37	53.3112	1298.48	135.541	1298.48	135.541	101.226
WCK12-1-67	107.012	111578	3.33216	11.8053	0.843149	2.59243	2.14968	0.221965	1.97743	0.919871	1292.25	23.1551	1298.5	15.7528	1308.83	16.3645	1308.83	16.3645	98.733
WCK12-1-56	50.6272	63600.1	2.57028	11.776	2.33849	2.55422	2.5421	0.218149	0.996853	0.392138	1272.09	11.5081	1287.64	18.5517	1313.66	45.3637	1313.66	45.3637	96.8353
WCK12-1-16	349.694	300785	2.0816	11.7208	0.416155	2.71693	0.787319	0.230958	0.668346	0.848889	1339.52	8.08369	1333.09	5.84359	1322.77	8.06213	1322.77	8.06213	101.266
WCK12-1-90	93.9417	148339	2.2738	11.657	1.02363	2.71041	1.55508	0.229151	1.17066	0.752799	1330.05	14.0691	1331.31	11.5349	1333.33	19.8005	1333.33	19.8005	99.7543
WCK12-1-36	16.3592	16227.7	1.73917	11.5167	5.28513	2.70918	5.59616	0.226289	1.83967	0.328739	1315.02	21.8843	1330.97	41.5261	1356.72	101.949	1356.72	101.949	96.9268
WCK12-1-44	94.1776	125855	2.87994	11.2467	1.19269	3.00178	1.49165	0.244851	0.895827	0.600561	1411.87	11.3587	1408.07	11.3616	1402.31	22.8508	1402.31	22.8508	100.681
WCK12-1-110	124.583	86516.8	1.95974	11.2349	0.797957	3.03415	2.32632	0.247232	2.18519	0.939331	1424.18	27.9233	1416.25	17.7676	1404.33	15.2836	1404.33	15.2836	101.414
WCK12-1-96	13.687	11537	2.70552	11.1433	4.00217	3.0169	4.95427	0.243821	2.92018	0.589427	1406.53	36.9017	1411.9	37.799	1419.99	76.5218	1419.99	76.5218	99.0522
WCK12-1-118	134.27	79346.4	2.39449	11.0413	0.739057	3.08936	1.0486	0.247392	0.743884	0.709405	1425.01	9.51058	1430.05	8.04384	1437.55	14.0918	1437.55	14.0918	99.1283
WCK12-1-40	281.353	275324	2.19117	11.0399	0.443166	3.1189	0.799797	0.249728	0.665793	0.832452	1437.07	8.57647	1437.36	6.14944	1437.78	8.44961	1437.78	8.44961	99.9509
WCK12-1-95	176.305	132257	2.54184	11.0071	0.370267	3.1678	2.03056	0.252888	1.99651	0.983234	1453.35	25.9782	1449.34	15.6722	1443.45	7.05427	1443.45	7.05427	100.686
WCK12-1-7	55.6626	54982.3	1.78609	10.985	1.46481	3.11908	2.30682	0.248499	1.78207	0.77252	1430.73	22.8654	1437.41	17.7384	1447.29	27.8943	1447.29	27.8943	98.856
WCK12-1-34	58.9871	63115.6	3.36342	10.9702	1.24844	3.21424	2.25918	0.255737	1.88289	0.833442	1467.99	24.7195	1460.6	17.4977	1449.84	23.7654	1449.84	23.7654	101.252
WCK12-1-15	125.494	108257	2.4729	10.9426	1.09079	3.21511	1.54893	0.255162	1.09971	0.709978	1465.04	14.4116	1460.81	11.9969	1454.64	20.7508	1454.64	20.7508	100.715
WCK12-1-60	196.116	248201	1.7224	10.9019	0.20528	3.1524	1.01838	0.249254	0.997479	0.979473	1434.63	12.8296	1445.59	7.8504	1461.73	3.90132	1461.73	3.90132	98.146
WCK12-1-64	49.4093	83042.6	1.87248	10.8499	1.24199	3.15018	1.53564	0.247892	0.903148	0.588123	1427.59	11.5654	1445.04	11.8361	1470.8	23.576	1470.8	23.576	97.0625
WCK12-1-23	61.8034	102419	2.02634	10.8459	2.28455	3.38199	2.56313	0.266033	1.16211	0.453395	1520.63	15.7419	1500.23	20.089	1471.51	43.3661	1471.51	43.3661	103.338
WCK12-1-52	33.7403	82942.9	2.03517	10.8294	3.58468	3.17444	3.88312	0.249327	1.49289	0.384457	1435	19.2062	1450.96	29.992	1474.4	68.0306	1474.4	68.0306	97.3281
WCK12-1-85	97.1078	60306.3	1.61584	10.8216	1.03286	3.32397	1.22633	0.260883	0.661116	0.539103	1494.36	8.81795	1486.7	9.57246	1475.76	19.593	1475.76	19.593	101.26
WCK12-1-98	65.5219	58689.1	3.28736	10.7636	0.661371	3.35735	0.92849	0.26209	0.651677	0.701867	1500.53	8.72391	1494.51	7.26422	1485.96	12.5286	1485.96	12.5286	100.981
WCK12-1-27	107.225	104083	1.42872	10.3601	0.38738	3.64734	0.951853	0.274055	0.869461	0.91344	1561.35	12.0564	1559.93	7.58543	1557.98	7.26852	1557.98	7.26852	100.216
WCK12-1-25	123.992	175270	1.16573	9.95983	0.486914	4.04243	1.30183	0.292007	1.20734	0.927419	1651.55	17.5905	1642.78	10.5975	1631.55	9.04921	1631.55	9.04921	101.226
WCK12-1-32	192.902	274495	1.41396	6.78911	0.236078	8.85258	0.868022	0.435895	0.835302	0.962305	2332.24	16.3464	2322.93	7.91934	2314.74	4.05066	2314.74	4.05066	100.756
WCK12-1-31	184.857	246683	0.856607	5.41287	0.155737	13.4182	0.532413	0.526771	0.509127	0.956262	2727.83	11.3238	2709.54	5.03113	2695.92	2.57278	2695.92	2.57278	101.184
FL-7 Wilhite Fm.	U	206Pb	U/Th	206Pb*	±	207Pb*	±	206Pb*	±	error	206Pb*	±	207Pb*	±	206Pb*	±	Best age	±	Conc
	(ppm)	204Pb		207Pb*	(%)	235U*	(%)	238U	(%)	corr.	238U*	(Ma)	235U	(Ma)	207Pb*	(Ma)	(Ma)	(Ma)	(%)
FL-7-50	14.2243	4418.12	1.56647	17.7934	15.2199	0.728627	16.9873	0.0940293	7.54475	0.44414	579.323	41.8026	555.747	72.8286	460.319	339.21	579.323	41.8026	125.853
FL-7-86	69.4791	55291.7	3.19531	14.0503	2.46032	1.61702	2.62385	0.164778	0.911815	0.347511	983.273	8.31536	976.835	16.4632	962.405	50.2608	962.405	50.2608	102.168
FL-7-74	64.6936	53428.2	2.31141	14.0082	1.61748	1.64109	1.84258	0.166731	0.882518	0.478959	994.072	8.12993	986.132	11.6258	968.516	32.9963	968.516	32.9963	102.639
FL-7-104	33.2119	16372.6	1.64717	13.9806	4.91152	1.60552	5.23447	0.162795	1.81015	0.345814	972.292	16.337	972.364	32.7623	972.509	100.221	972.509	100.221	99.9777
FL-7-13	72.0769	24143.1	1.40157	13.98	2.22457	1.61373	2.33298	0.16362	0.702904	0.30129	976.863	6.37148	975.557	14.6265	972.598	45.3722	972.598	45.3722	100.439
FL-7-37	145.432	126504	2.80661	13.8378	0.812302	1.64585	1.1249	0.165179	0.778178	0.691777	985.493	7.11147	987.959	7.10518	993.425	16.5072	993.425	16.5072	99.2015
FL-7-8	55.4875	29274.6	1.6697	13.8048	4.67137	1.68103	4.78844	0.168309	1.05234	0.219766	1002.79	9.77286	1001.37	30.495	998.264	94.9608	998.264	94.9608	100.453
FL-7-115	75.793	58243.7	2.06714	13.7864	2.06689	1.67997	2.21355	0.167977	0.792319	0.357941	1000.95	7.3457	1000.97	14.0902	1000.98	41.9732	1000.98	41.9732	99.997
FL-7-114	264.856	246444	2.14539	13.7637	0.622842	1.66812	0.940173	0.166518	0.704267	0.749083	992.896	6.48074	996.469	5.96848	1004.32	12.6372	1004.32	12.6372	98.8624
FL-7-67	45.2326	33699.9	2.90929	13.7588	3.76769	1.76283	4.11649	0.17591	1.65832	0.402848	1044.59	15.992	1031.89	26.6755	1005.04	76.4821	1005.04	76.4821	103.935
FL-7-98	46.5424	46380.5	1.27595	13.6649	3.91612	1.76317	4.45524	0.174742	2.12442	0.476837	1038.19	20.3712	1032.01	28.8738	1018.93	79.3307	1018.93	79.3307	101.89
FL-7-100	139.842	226057	1.07728	13.6331	1.27838	1.74057	1.506	0.172102	0.796108	0.528624	1023.68	7.53547	1023.67	9.71223	1023.64	25.8887	1023.64	25.8887	100.004
FL-7-89	188.6	71178.8	3.30293	13.6271	1.15523	1.75544	1.27921	0.173496	0.549379	0.429467	1031.34	5.23599	1029.17	8.27518	1024.53	23.3925	1024.53	23.3925	100.665
FL-7-47	510.746	282450	3.98452	13.609	0.290959	1.77195	0.894178	0.174895	0.845516	0.945579	1039.03	8.11371	1035.24	5.80397	1027.22	5.88487	1027.22	5.88487	101.15
FL-7-9	52.629	31102.2	1.69821	13.5899	1.62477	1.73271	2.46839	0.170782	1.85825	0.752817	1016.42	17.4739	1020.76	15.8932	1030.06	32.867	1030.06	32.867	98.6761
FL-7-74B	31.7447	31390.1	1.84222	13.5765	5.7629	1.61659	8.00947	0.159179	5.56243	0.694481	952.212	49.2409	976.667	50.2866	1032.06	116.541	1032.06	116.541	92.2635
FL-7-119	15.7999	9589.11	0.728283	13.5718	9.75874	1.74658	10.2266	0.17192	3.0579	0.299014	1022.68	28.9183	1025.9	66.1259	1032.75	197.648	1032.75	197.648	99.0249
FL-7-3	73.1101	51340.4	2.55053	13.5457	1.85741	1.77779	2.10388	0.174655	0.988099	0.469657	1037.71	9.47088	1037.37	13.6728	1036.64	37.5333	1036.64	37.5333	100.103
FL-7-26	419.661	222234	1.84973	13.466	0.401226	1.8378	1.24114	0.179487	1.1745	0.946306	1064.17	11.5216	1059.07	8.16161	1048.6	8.10693	1048.6	8.10693	101.486
FL-7-73	443.648	353165	1.33687	13.4507	0.449228	1.84736	0.876415	0.180217	0.752528	0.858643	1068.16	7.40756	1062.49	5.77369	1050.88	9.07239	1050.88	9.07239	101.645
FL-7-99	226.892	176043	3.53644	13.4497	0.874755	1.79907	1.01899	0.175493	0.522624	0.512886	1042.3	5.02975	1045.12	6.65025	1051.03	17.6477	1051.03	17.6477	99.1697
FL-7-112	431.116	210225	4.05002	13.4488	0.447034	1.83044	0.674767	0.17854	0.505441	0.749061	1058.99	4.93606	1056.44	4.43086	1051.17	9.02768	1051.17	9.02768	100.744
FL-7-49	72.9272	44600.2	22.0017	13.4397	2.25615	1.82688	2.36149	0.178074	0.697463	0.295348	1056.44	6.79622	1055.16	15.4972	1052.53	45.4801	1052.53	45.4801	100.372
FL-7-95	395.36	137935	2.24784	13.4174	0.497713	1.8451	1.11755	0.179551	1.0006	0.895351	1064.52	9.81859	1061.68	7.35912	1055.87	10.0219	1055.87	10.0219	100.819
FL-7-35	153.389	92419.5	1.58047	13.3975	1.29075	1.81387	1.4999	0.17625	0.76399	0.509359	1046.46	7.37965	1050.48	9.81769	1058.86	26.0001	1058.86	26.0001	98.8282
FL-7-58	46.2864	44004.1	2.14916	13.3811	3.22128	1.71132	3.51731	0.166082	1.41238	0.401552	990.486	12.9677	1012.78	22.5457	1061.33	64.8311	1061.33	64.8311	93.3246
FL-7-120	939.404	717196	2.99299	13.3724	0.237691	1.83994	0.764695	0.178448	0.726816	0.950465	1058.49	7.09486	1059.84	5.03056	1062.64	4.7809	1062.64	4.7809	99.6093
FL-7-6	473.019	167191	4.10392	13.3621	0.451694	1.84821	1.03713	0.179112	0.933606	0.900178	1062.12	9.14221	1062.79	6.83362	1064.19	9.0848	1064.19	9.0848	99.8056
FL-7-102	67.2269	53630.2	2.01618	13.3579	1.82634	1.85156	2.15781	0.179381	1.14919	0.532571	1063.59	11.2676	1063.99	14.2275	1064.82	36.7501	1064.82	36.7501	99.8848
FL-7-4	219.351	186496	17.9137	13.3342	0.450954	1.84288	1.1558	0.178223	1.06419	0.920744	1057.26	10.3771	1060.89	7.60779	1068.39	9.06083	1068.39	9.06083	98.9581
FL-7-7	53.478	23923.2	1.30543	13.3219	1.7874	1.77515	2.23071	0.171514	1.33464	0.598302	1020.45	12.5961	1036.41	14.4894	1070.24	35.9274	1070.24	35.9274	95.3474
FL-7-23	284.592	101421	1.84489	13.3091	0.608934	1.89813	0.987642	0.183221	0.777583	0.787313	1084.55	7.762	1080.43	6.56815	1072.17	12.232	1072.17	12.232	101.154
FL-7-78	286.973	448629	1.84772	13.2464	0.319162	1.9323	0.710835	0.18564	0.635155	0.893534	1097.71	6.41087	1092.33	4.75628	1081.61	6.40244	1081.61	6.40244	101.489
FL-7-87	45.9467	23090.1	1.09433	13.2447	2.29693	1.85647	2.38565	0.178331	0.644524	0.270168	1057.85	6.28808	1065.73	15.7445	1081.91	46.0984	1081.91	46.0984	97.7763
FL-7-33	256.636	130010	9.33393	13.2255	0.676432	1.91607	1.32368	0.18379	1.13779	0.859566	1087.65	11.3875	1086.7	8.83154	1084.82	13.5629	1084.82	13.5629	100.261
FL-7-80	72.5596	77287.3	2.38267	13.216	2.17442	1.96521	2.60955	0.188368	1.4428	0.552891	1112.53	14.7428	1103.67	17.5628	1086.27	43.6028	1086.27	43.6028	102.417
FL-7-92	22.6003	28686.3	1.08028	13.2104	9.57842	1.92782	9.73733	0.184707	1.75203	0.179929	1092.64	17.6089	1090.78	65.1911	1087.08	192.409	1087.08	192.409	100.511
FL-7-55	1171.18	110433	4.53523	13.1368	0.192966	1.89522	1.18344	0.180571	1.1676	0.986617	1070.09	11.5125	1079.42	7.86615	1098.26	3.86087	1098.26	3.86087	97.435
FL-7-88	577.563	194668	9.88879	13.0852	0.376368	1.97535	0.682992	0.187467	0.569934	0.834467	1107.64	5.80024	1107.13	4.6042	1106.15	7.50384	1106.15	7.50384	100.135
FL-7-10	38.5064	35186.6	1.61034	12.9152	4.0006	2.00375	4.43737	0.187691	1.91975	0.432632	1108.85	19.557	1116.78	30.065	1132.24	79.6808	1132.24	79.6808	97.9342
FL-7-94	43.5029	52392.6	1.88398	12.8921	3.73135	2.12169	3.94199	0.198382	1.27134	0.322513	1166.62	13.5672	1155.89	27.2108	1135.79	74.2755	1135.79	74.2755	102.715
FL-7-109	38.3621	36714.6	1.70846	12.8837	1.86685	2.13595	2.3505	0.199586	1.42819	0.607612	1173.1	15.3181	1160.51	16.2573	1137.12	37.1462	1137.12	37.1462	103.164
FL-7-60	82.2393	78346.4	2.08677	12.8717	1.67515	2.1286	1.87329	0.198714	0.838508	0.447613	1168.41	8.96063	1158.13	12.942	1138.97	33.331	1138.97	33.331	102.585
FL-7-48	44.3564	31907	1.61844	12.8504	2.20949	2.07213	2.44502	0.193123	1.04702	0.428225	1138.27	10.925	1139.64	16.7467	1142.25	43.9315	1142.25	43.9315	99.6516
FL-7-90	171.206	165443	2.13086	12.8271	0.92313	2.07983	1.2187	0.193489	0.795656	0.652871	1140.25	8.31537	1142.18	8.35678	1145.87	18.3426	1145.87	18.3426	99.5094
FL-7-110	54.0904	62037.1	2.32531	12.8081	3.90422	2.16922	4.16058	0.201504	1.43788	0.345596	1183.4	15.5453	1171.23	28.9236	1148.82	77.552	1148.82	77.552	103.01
FL-7-75	93.3337	88723.3	2.09144	12.8067	1.12914	2.09721	3.04	0.194795	2.82253	0.928462	1147.3	29.665	1147.89	20.9043	1149.03	22.4438	1149.03	22.4438	99.8496
FL-7-30	198.087	107458	4.18928	12.7914	0.871008	2.12726	1.37705	0.197351	1.06659	0.774546	1161.07	11.3327	1157.7	9.51149	1151.4	17.293	1151.4	17.293	100.84
FL-7-12	150.144	168022	2.55576	12.7623	0.847998	2.12029	1.05516	0.196257	0.6279	0.595076	1155.18	6.64062	1155.43	7.28041	1155.89	16.84	1155.89	16.84	99.9388
FL-7-97	82.5211	35367.4	1.97988	12.7462	1.89981	2.12734	2.07414	0.196661	0.832325	0.401288	1157.36	8.81777	1157.72	14.3271	1158.39	37.6644	1158.39	37.6644	99.9112
FL-7-91	72.5559	48621.4	2.17745	12.7408	1.86593	2.11807	2.48097	0.19572	1.63509	0.659052	1152.29	17.2531	1154.71	17.1138	1159.23	36.9879	1159.23	36.9879	99.4009
FL-7-96	398.618	191565	2.60204	12.7405	0.505886	2.14416	0.948635	0.198127	0.802488	0.84594	1165.25	8.55456	1163.17	6.56883	1159.28	10.0266	1159.28	10.0266	100.515
FL-7-79	50.3884	41885.1	2.46124	12.7387	3.49958	2.15539	4.51356	0.199136	2.85047	0.631535	1170.68	30.5154	1166.79	31.3155	1159.56	69.4347	1159.56	69.4347	100.959
FL-7-14	39.8098	21804.5	1.27761	12.7354	4.91229	2.13112	4.9857	0.196842	0.852415	0.170972	1158.33	9.03754	1158.95	34.4692	1160.08	97.4602	1160.08	97.4602	99.8494
FL-7-77	193.578	117723	11.9765	12.7354	0.950142	2.0839	1.09005	0.19248	0.534264	0.490128	1134.8	5.55916	1143.52	7.47929	1160.08	18.8589	1160.08	18.8589	97.8204
FL-7-29	83.1782	109480	1.92214	12.735	1.42247	2.18759	3.60802	0.202052	3.31579	0.919003	1186.34	35.9294	1177.1	25.1473	1160.13	28.2131	1160.13	28.2131	102.259
FL-7-82	226.849	321796	2.6435	12.7322	0.532722	2.18132	0.849152	0.201428	0.661261	0.778731	1182.99	7.14683	1175.1	5.91197	1160.58	10.5649	1160.58	10.5649	101.931
FL-7-103	170.755	164215	7.56419	12.7213	0.716142	2.15455	0.902809	0.198787	0.549731	0.608912	1168.8	5.87645	1166.52	6.2611	1162.27	14.2061	1162.27	14.2061	100.562
FL-7-93	238.514	223156	5.30125	12.7146	0.647599	2.1487	0.864909	0.198141	0.573309	0.662855	1165.33	6.11187	1164.63	5.99308	1163.32	12.8451	1163.32	12.8451	100.172
FL-7-68	144.075	94605.1	2.19887	12.7046	1.17548	2.15676	1.73055	0.19873	1.27006	0.733905	1168.49	13.5732	1167.23	12.0059	1164.87	23.2924	1164.87	23.2924	100.311
FL-7-51	49.4149	58752.6	2.0615	12.7012	2.0945	2.08361	2.63653	0.191938	1.60135	0.607372	1131.87	16.6232	1143.42	18.0911	1165.4	41.521	1165.4	41.521	97.1227
FL-7-22	92.5829	51847.3	1.46935	12.6791	1.6815	2.16435	3.65547	0.199028	3.24577	0.887922	1170.1	34.7317	1169.67	25.3926	1168.85	33.3062	1168.85	33.3062	100.106
FL-7-111	62.9101	48361.9	1.70839	12.6784	2.28042	2.17962	2.57481	0.200422	1.19555	0.464326	1177.59	12.8676	1174.56	17.9236	1168.96	45.1644	1168.96	45.1644	100.738
FL-7-62	555.764	401556	2.2885	12.6749	0.355398	2.17964	0.629777	0.200368	0.519915	0.825554	1177.3	5.59455	1174.56	4.38355	1169.5	7.05585	1169.5	7.05585	100.666
FL-7-5	107.185	54400.5	1.83259	12.6628	2.04372	2.14455	2.30517	0.196954	1.06629	0.462567	1158.94	11.3106	1163.29	15.9641	1171.43	40.4447	1171.43	40.4447	98.9336
FL-7-39	60.8212	85358.2	1.35173	12.6591	2.51047	2.16819	2.73308	0.199068	1.08039	0.395301	1170.31	11.5626	1170.9	18.9941	1172.01	49.6999	1172.01	49.6999	99.8548
FL-7-84	88.4805	72735.2	1.04479	12.6486	1.82638	2.21575	2.08199	0.203265	0.999501	0.480071	1192.84	10.8844	1186.03	14.5672	1173.66	36.1338	1173.66	36.1338	101.634
FL-7-32	231.243	687487	4.43045	12.627	0.546086	2.19034	1.18353	0.200591	1.05001	0.887189	1178.49	11.3091	1177.97	8.25072	1177.03	10.8198	1177.03	10.8198	100.124
FL-7-28	21.8799	15537.8	2.33265	12.6191	9.10608	2.16082	9.24923	0.197764	1.62099	0.175257	1163.3	17.2534	1168.53	64.2886	1178.28	180.444	1178.28	180.444	98.7286
FL-7-72	205.911	144872	1.86516	12.6173	0.58819	2.18667	0.762829	0.200101	0.485737	0.636757	1175.86	5.22097	1176.8	5.31505	1178.56	11.6312	1178.56	11.6312	99.7716
FL-7-18	236.354	150726	5.43376	12.6165	0.561045	2.17673	1.72877	0.199178	1.6352	0.945874	1170.9	17.5084	1173.63	12.0285	1178.69	11.1139	1178.69	11.1139	99.3389
FL-7-64	155.011	121940	1.75814	12.5935	0.832784	2.20113	1.05907	0.201044	0.654294	0.6178	1180.93	7.0603	1181.4	7.39443	1182.29	16.4646	1182.29	16.4646	99.8847
FL-7-61	73.3199	52679.5	2.31342	12.5655	1.54905	2.24245	1.86589	0.204363	1.04019	0.557475	1198.72	11.3782	1194.43	13.1036	1186.69	30.5976	1186.69	30.5976	101.014
FL-7-11	103.855	66101.1	1.60174	12.5079	1.49903	2.20929	1.65262	0.200417	0.695747	0.420997	1177.56	7.48811	1183.99	11.5522	1195.73	29.5715	1195.73	29.5715	98.4808
FL-7-21	68.995	52004.8	2.08985	12.5035	1.28387	2.20007	1.55445	0.199511	0.876348	0.563768	1172.69	9.39633	1181.07	10.8518	1196.41	25.3059	1196.41	25.3059	98.0174
FL-7-81	53.697	65284.6	1.29964	12.4957	1.67336	2.22266	2.02881	0.201433	1.14715	0.565429	1183.01	12.3985	1188.21	14.2088	1197.69	33.0196	1197.69	33.0196	98.7745
FL-7-65	39.3273	22643.9	2.19129	12.4128	2.33819	2.22053	2.54476	0.199906	1.00433	0.394665	1174.81	10.7863	1187.54	17.8177	1210.79	46.0468	1210.79	46.0468	97.0287
FL-7-83	26.8394	25495.2	1.45494	12.2881	5.07545	2.21179	5.85946	0.197118	2.92799	0.499702	1159.82	31.0799	1184.78	40.994	1230.64	99.6657	1230.64	99.6657	94.245
FL-7-53	144.574	109991	2.15019	12.1881	0.900293	2.42557	1.2415	0.214411	0.854866	0.688575	1252.28	9.72968	1250.21	8.92625	1246.67	17.6388	1246.67	17.6388	100.45
FL-7-76	175.262	134813	1.88291	12.1859	0.735412	2.45138	0.866023	0.216655	0.457347	0.5281	1264.18	5.25008	1257.83	6.24573	1246.97	14.3898	1246.97	14.3898	101.38
FL-7-117	612.761	494624	3.62154	12.0196	0.248465	2.50353	0.557839	0.218244	0.49945	0.895329	1272.59	5.76791	1273.06	4.04751	1273.84	4.83481	1273.84	4.83481	99.9016
FL-7-108	100.769	170307	2.23333	12.0087	1.20301	2.54546	2.11299	0.221697	1.7371	0.822104	1290.84	20.3208	1285.14	15.4048	1275.61	23.4599	1275.61	23.4599	101.194
FL-7-70	33.6926	26635	1.85446	11.7582	3.65268	2.65744	8.43112	0.226623	7.59879	0.901279	1316.78	90.5074	1316.71	62.2795	1316.59	70.8248	1316.59	70.8248	100.014
FL-7-19	33.6114	25642	1.8133	11.7461	1.99845	2.584	2.27806	0.220133	1.09351	0.480017	1282.58	12.718	1296.12	16.6786	1318.59	38.7396	1318.59	38.7396	97.269
FL-7-25	109.115	164586	1.13763	11.6704	1.03258	2.74507	1.1269	0.232347	0.451321	0.400496	1346.79	5.4854	1340.75	8.38727	1331.11	19.9795	1331.11	19.9795	101.178
FL-7-17	38.0023	36764.8	0.799361	11.6413	3.77986	2.73999	3.84674	0.231339	0.714193	0.185662	1341.51	8.64978	1339.37	28.6231	1335.94	73.1128	1335.94	73.1128	100.417
FL-7-27	124.838	84508.7	1.42126	11.5831	0.759685	2.78283	0.889552	0.233781	0.462799	0.52026	1354.28	5.65303	1350.94	6.64473	1345.63	14.6687	1345.63	14.6687	100.643
FL-7-85	52.4438	125066	1.66125	9.47063	1.44018	4.47831	3.42888	0.307604	3.11177	0.907517	1728.91	47.19	1726.96	28.4685	1724.59	26.4485	1724.59	26.4485	100.25
WC12-2A Shields Fm.	U	206Pb	U/Th	206Pb*	±	207Pb*	±	206Pb*	±	error	206Pb*	±	207Pb*	±	206Pb*	±	Best age	±	Conc
	(ppm)	204Pb		207Pb*	(%)	235U*	(%)	238U	(%)	corr.	238U*	(Ma)	235U	(Ma)	207Pb*	(Ma)	(Ma)	(Ma)	(%)
WC12-2A-18	128.929	11028.9	2.3256	16.5183	1.79469	0.872611	4.25992	0.104541	3.86342	0.906923	640.964	23.5719	636.984	20.1587	622.869	38.7114	640.964	23.5719	102.905
WC12-2A-114	129.81	102655	3.08649	14.1064	0.894743	1.58559	1.1221	0.16222	0.677156	0.603473	969.104	6.09289	964.566	6.98713	954.244	18.2905	954.244	18.2905	101.557
WC12-2A-107	80.1146	31679.7	2.14345	13.975	1.26463	1.66567	1.62621	0.168826	1.02239	0.628695	1005.64	9.51971	995.536	10.3182	973.366	25.7883	973.366	25.7883	103.315
WC12-2A-6	56.2612	22346.1	1.73738	13.9706	2.13241	1.64563	2.47819	0.166743	1.26263	0.509497	994.142	11.6324	987.877	15.6532	973.971	43.4836	973.971	43.4836	102.071
WC12-2A-31	49.4249	40479	1.49586	13.9014	3.99096	1.70129	4.15874	0.171527	1.16935	0.281179	1020.52	11.0369	1009.02	26.601	984.134	81.2966	984.134	81.2966	103.697
WC12-2A-49	94.7628	45994	0.988508	13.7666	0.748189	1.68343	1.25289	0.168081	1.00495	0.802113	1001.53	9.32205	1002.28	7.98096	1003.9	15.175	1003.9	15.175	99.7639
WC12-2A-78	179.034	143489	0.58067	13.7536	0.855178	1.72356	1.06977	0.171926	0.642714	0.600796	1022.71	6.07822	1017.35	6.87412	1005.82	17.3508	1005.82	17.3508	101.68
WC12-2A-13	104.103	61039.6	2.58768	13.7449	1.79479	1.73521	2.07528	0.172979	1.04189	0.502047	1028.5	9.90473	1021.69	13.3688	1007.09	36.3985	1007.09	36.3985	102.126
WC12-2A-110	90.8249	137285	0.662443	13.7241	1.85648	1.74245	1.96651	0.173438	0.648567	0.329806	1031.02	6.17955	1024.37	12.6873	1010.16	37.6463	1010.16	37.6463	102.065
WC12-2A-93	83.095	90490.2	2.38266	13.7024	2.46469	1.75912	2.66885	0.17482	1.02376	0.383595	1038.61	9.82057	1030.53	17.2791	1013.38	49.9592	1013.38	49.9592	102.491
WC12-2A-113	141.769	58098.6	1.36189	13.687	1.03214	1.69153	1.62945	0.167913	1.26087	0.773799	1000.6	11.6859	1005.34	10.3984	1015.66	20.8918	1015.66	20.8918	98.5174
WC12-2A-2	46.6022	44642.3	1.61214	13.6699	2.93721	1.7543	3.08583	0.173928	0.946139	0.306607	1033.72	9.03651	1028.75	19.9596	1018.19	59.5111	1018.19	59.5111	101.525
WC12-2A-51	72.4168	31234.1	1.77132	13.6509	1.85733	1.79774	1.93272	0.177987	0.534515	0.276562	1055.97	5.20625	1044.64	12.6107	1021	37.6018	1021	37.6018	103.425
WC12-2A-46	95.9252	86920.4	2.2647	13.6471	1.59715	1.77784	1.91545	0.175967	1.05737	0.552024	1044.91	10.1996	1037.39	12.4482	1021.56	32.3499	1021.56	32.3499	102.285
WC12-2A-42	51.5741	33022.1	2.76654	13.641	2.5706	1.73471	2.76086	0.171622	1.00715	0.364795	1021.04	9.51034	1021.5	17.7842	1022.47	52.0393	1022.47	52.0393	99.86
WC12-2A-22	50.1461	36763	1.29012	13.6249	2.53101	1.75688	3.07273	0.17361	1.74232	0.567027	1031.97	16.6149	1029.7	19.8854	1024.87	51.2289	1024.87	51.2289	100.693
WC12-2A-10a	70.7039	46744.3	1.27025	13.613	1.62555	1.69828	1.81596	0.167672	0.809498	0.44577	999.271	7.49331	1007.88	11.6058	1026.64	32.9004	1026.64	32.9004	97.3346
WC12-2A-9	123.536	268405	4.19682	13.6037	2.10346	1.71504	2.29584	0.169212	0.919966	0.400711	1007.77	8.58276	1014.17	14.7265	1028.02	42.5483	1028.02	42.5483	98.0302
WC12-2A-50	173.52	173606	2.41552	13.6001	0.990731	1.74077	1.12781	0.171705	0.538893	0.477823	1021.5	5.09079	1023.75	7.27347	1028.55	20.0525	1028.55	20.0525	99.3148
WC12-2A-105	58.9588	33939.3	1.07083	13.5883	3.57661	1.73779	3.70968	0.171263	0.984664	0.265431	1019.07	9.28144	1022.65	23.9136	1030.3	72.3426	1030.3	72.3426	98.91
WC12-2A-40	35.1975	18905.1	0.765114	13.561	5.56452	1.80774	5.72471	0.177797	1.3448	0.234911	1054.93	13.0867	1048.26	37.442	1034.37	112.5	1034.37	112.5	101.988
WC12-2A-86	20.1387	11504	0.725732	13.5431	8.55143	1.84208	8.70443	0.180936	1.62484	0.186668	1072.09	16.0483	1060.6	57.3461	1037.03	172.995	1037.03	172.995	103.381
WC12-2A-14	105.208	91484.6	1.86478	13.5071	1.65992	1.8174	2.49547	0.178038	1.86334	0.74669	1056.25	18.1537	1051.75	16.3464	1042.4	33.515	1042.4	33.515	101.328
WC12-2A-92	64.9234	58025.6	2.05587	13.5029	1.95666	1.76132	2.14351	0.172491	0.875299	0.408348	1025.82	8.30101	1031.33	13.8837	1043.03	39.4968	1043.03	39.4968	98.3501
WC12-2A-104	84.6815	46741.8	5.57568	13.5017	1.82948	1.84052	2.08334	0.180231	0.996644	0.478388	1068.23	9.81116	1060.05	13.7075	1043.21	36.9328	1043.21	36.9328	102.399
WC12-2A-54	52.0192	37937.4	0.951455	13.4812	3.43523	1.82276	3.48793	0.178219	0.603996	0.173168	1057.24	5.88953	1053.68	22.8731	1046.32	69.309	1046.32	69.309	101.043
WC12-2A-19	49.9625	47893.6	1.11316	13.4752	3.86609	1.86539	4.39514	0.182307	2.09061	0.475663	1079.57	20.781	1068.9	29.0608	1047.21	77.9826	1047.21	77.9826	103.09
WC12-2A-103	111.761	67188.2	2.26772	13.4709	1.26662	1.81731	2.40154	0.177551	2.04036	0.849604	1053.58	19.8321	1051.72	15.7307	1047.86	25.5574	1047.86	25.5574	100.546
WC12-2A-10b	153.13	83482.6	2.26413	13.4582	0.995984	1.78525	1.19229	0.174254	0.655413	0.54971	1035.51	6.26982	1040.09	7.75987	1049.76	20.0948	1049.76	20.0948	98.6424
WC12-2A-83	70.1041	77375.1	1.73311	13.4551	2.58586	1.80605	2.8469	0.176245	1.19087	0.418305	1046.43	11.5028	1047.65	18.6074	1050.22	52.141	1050.22	52.141	99.6387
WC12-2A-58	57.7355	45934.7	1.49051	13.4108	2.08024	1.77255	2.77202	0.172406	1.83213	0.660937	1025.35	17.368	1035.45	17.9966	1056.86	41.8966	1056.86	41.8966	97.0187
WC12-2A-3	339.271	358426	2.19547	13.4023	0.609176	1.80529	0.834536	0.175479	0.5704	0.683493	1042.23	5.48919	1047.38	5.45317	1058.14	12.2622	1058.14	12.2622	98.4959
WC12-2A-55	41.8392	23880.9	1.92626	13.4011	5.8294	1.77622	6.38692	0.172639	2.60976	0.40861	1026.63	24.7682	1036.8	41.5152	1058.32	117.46	1058.32	117.46	97.0058
WC12-2A-77	50.4716	60735.9	2.38009	13.342	2.42469	1.86732	2.64544	0.180691	1.05795	0.399915	1070.75	10.4372	1069.58	17.495	1067.22	48.7703	1067.22	48.7703	100.331
WC12-2A-85	77.4313	45081.8	3.3233	13.341	2.64158	1.95014	2.78994	0.188691	0.897671	0.321753	1114.28	9.18581	1098.49	18.7282	1067.37	53.1296	1067.37	53.1296	104.395
WC12-2A-63	14.6003	24723.2	1.33683	13.3298	9.87304	1.90154	10.1948	0.183835	2.54096	0.249242	1087.89	25.4364	1081.63	67.941	1069.05	198.889	1069.05	198.889	101.762
WC12-2A-27	43.7269	51871.3	1.67277	13.3273	4.18333	1.81988	4.41596	0.175907	1.41437	0.320285	1044.58	13.6393	1052.64	28.9457	1069.43	84.0862	1069.43	84.0862	97.6759
WC12-2A-34	86.5852	66084.9	1.56866	13.2237	1.62734	1.90668	1.83337	0.182865	0.84441	0.460578	1082.6	8.41524	1083.42	12.2119	1085.09	32.6288	1085.09	32.6288	99.7709
WC12-2A-7	33.0277	33357.1	1.37818	13.1124	3.83733	1.97095	4.28209	0.187437	1.90032	0.443783	1107.48	19.3371	1105.63	28.8525	1102.02	76.7892	1102.02	76.7892	100.495
WC12-2A-33	27.6662	21515.3	1.09961	13.0788	5.84542	2.03903	6.16319	0.193415	1.95346	0.316957	1139.85	20.4091	1128.64	42.0119	1107.16	116.903	1107.16	116.903	102.953
WC12-2A-68	476.011	529974	0.722323	13.064	0.446019	2.001	0.839208	0.189593	0.710871	0.847073	1119.17	7.30353	1115.85	5.68179	1109.37	8.92273	1109.37	8.92273	100.883
WC12-2A-64	38.626	22019.3	2.15463	13.0452	3.50153	2.0333	4.0266	0.192375	1.98815	0.493754	1134.23	20.6778	1126.72	27.4132	1112.25	69.9607	1112.25	69.9607	101.976
WC12-2A-100	48.8791	41360	1.14702	13.0332	1.55761	1.9	1.93422	0.179598	1.14676	0.592881	1064.78	11.2554	1081.09	12.8681	1114.09	31.1143	1114.09	31.1143	95.5738
WC12-2A-116	24.9815	15775.5	2.00707	12.9677	3.64745	2.0928	3.95391	0.196829	1.52627	0.386016	1158.26	16.1811	1146.45	27.1729	1124.14	72.7292	1124.14	72.7292	103.035
WC12-2A-84	83.3327	244364	2.236	12.9148	1.51235	2.05515	2.00597	0.1925	1.31784	0.656961	1134.9	13.7137	1134.01	13.7022	1132.29	30.0934	1132.29	30.0934	100.231
WC12-2A-101	178.361	129740	2.51967	12.8931	0.86935	2.10354	1.08513	0.196701	0.649413	0.598466	1157.58	6.88115	1149.97	7.46815	1135.63	17.2823	1135.63	17.2823	101.933
WC12-2A-47	112.81	90368.9	1.72441	12.8854	1.74269	2.07796	1.79387	0.194193	0.425417	0.237151	1144.05	4.45955	1141.56	12.2975	1136.86	34.6754	1136.86	34.6754	100.632
WC12-2A-26	39.658	42300.3	3.15721	12.865	3.07992	2.12865	3.24924	0.198615	1.0352	0.318598	1167.88	11.058	1158.15	22.4506	1139.97	61.2837	1139.97	61.2837	102.448
WC12-2A-24	60.2506	77853.1	1.44955	12.852	1.65564	2.12624	1.88877	0.19819	0.909024	0.481278	1165.59	9.69282	1157.36	13.0444	1141.99	32.9364	1141.99	32.9364	102.066
WC12-2A-96	35.3393	27577.1	1.48256	12.8431	4.42586	2.09135	4.62451	0.194803	1.34086	0.289946	1147.34	14.0929	1145.97	31.7773	1143.38	88.0148	1143.38	88.0148	100.347
WC12-2A-81	59.1572	100492	2.40715	12.8342	1.81801	2.11961	1.97756	0.197299	0.778171	0.393501	1160.79	8.26638	1155.21	13.644	1144.73	36.1516	1144.73	36.1516	101.403
WC12-2A-65	71.8446	139410	1.62285	12.8326	1.75474	2.05265	2.07661	0.191041	1.11049	0.534759	1127.01	11.4824	1133.18	14.1792	1145.02	34.8918	1145.02	34.8918	98.4272
WC12-2A-106	123.65	69965.6	2.56155	12.8233	1.14816	2.16748	1.93705	0.201584	1.56009	0.805396	1183.82	16.8721	1170.67	13.4597	1146.43	22.7977	1146.43	22.7977	103.262
WC12-2A-48	173.155	184684	2.16836	12.8211	0.803329	2.0837	1.12425	0.193758	0.786511	0.699588	1141.7	8.22935	1143.45	7.71372	1146.78	15.9605	1146.78	15.9605	99.5571
WC12-2A-60	171.266	82396.6	2.23145	12.7777	1.03371	2.13795	1.88184	0.198129	1.57251	0.835622	1165.26	16.7632	1161.16	13.0193	1153.5	20.5262	1153.5	20.5262	101.02
WC12-2A-80	68.7897	23756.2	2.42405	12.7773	2.21393	2.10396	3.30033	0.194973	2.44759	0.741619	1148.26	25.744	1150.1	22.7186	1153.56	43.9647	1153.56	43.9647	99.5404
WC12-2A-59	189.437	201394	1.69748	12.7736	0.398208	2.12126	0.99427	0.19652	0.911045	0.916295	1156.6	9.64596	1155.75	6.86127	1154.13	7.89351	1154.13	7.89351	100.214
WC12-2A-109	81.1095	57405.2	2.14094	12.7664	1.58014	2.17681	1.95255	0.201552	1.147	0.587439	1183.65	12.4031	1173.66	13.5859	1155.25	31.3736	1155.25	31.3736	102.458
WC12-2A-67	76.9689	60575.1	2.64219	12.7498	1.56633	2.17014	1.70681	0.200673	0.678095	0.397289	1178.93	7.30589	1171.52	11.8643	1157.84	31.0886	1157.84	31.0886	101.822
WC12-2A-1	70.657	42476.8	1.85508	12.7476	1.99065	2.12862	3.13096	0.1968	2.41665	0.771856	1158.1	25.6175	1158.14	21.6331	1158.18	39.4755	1158.18	39.4755	99.9934
WC12-2A-45	51.102	31480.8	2.4356	12.7352	3.37823	2.14718	3.66465	0.198323	1.42028	0.387562	1166.31	15.1528	1164.14	25.3922	1160.1	66.9844	1160.1	66.9844	100.535
WC12-2A-39	71.8812	97057.1	1.74776	12.7348	2.0779	2.14425	2.31466	0.198046	1.0198	0.440585	1164.82	10.8675	1163.2	16.0292	1160.17	41.1859	1160.17	41.1859	100.401
WC12-2A-70	69.7398	65965.7	1.94674	12.7267	1.70347	2.15717	2.04382	0.199114	1.12934	0.552564	1170.56	12.0889	1167.36	14.1804	1161.42	33.7627	1161.42	33.7627	100.786
WC12-2A-98	20.6056	25773.8	0.701283	12.7032	8.28201	2.10458	8.58749	0.193899	2.27009	0.264348	1142.46	23.7668	1150.31	59.1766	1165.1	164.372	1165.1	164.372	98.0575
WC12-2A-99	32.0032	16045.3	2.15086	12.6979	2.68354	2.1477	3.10485	0.197789	1.56165	0.502969	1163.43	16.6236	1164.31	21.5138	1165.93	53.1861	1165.93	53.1861	99.786
WC12-2A-21	100.755	117815	1.64294	12.6742	1.19424	2.1785	1.42893	0.200252	0.784635	0.549105	1176.67	8.439	1174.2	9.9447	1169.62	23.6397	1169.62	23.6397	100.603
WC12-2A-88	227.708	156415	2.4853	12.6527	0.485869	2.18395	1.01581	0.200413	0.892079	0.878193	1177.54	9.60101	1175.94	7.07501	1173.02	9.63461	1173.02	9.63461	100.386
WC12-2A-111	45.345	38570.7	2.13906	12.6501	3.1519	2.15732	3.34835	0.197928	1.13003	0.337488	1164.18	12.0361	1167.41	23.2344	1173.42	62.4097	1173.42	62.4097	99.2126
WC12-2A-29	177.855	38455.4	0.899612	12.6467	0.760185	2.14299	2.92149	0.19656	2.82086	0.965554	1156.82	29.872	1162.79	20.2288	1173.95	15.0615	1173.95	15.0615	98.5405
WC12-2A-102	62.0376	43681.5	1.80216	12.6396	1.98638	2.13105	3.04471	0.195356	2.3075	0.757872	1150.32	24.3103	1158.93	21.0446	1175.07	39.2866	1175.07	39.2866	97.8942
WC12-2A-95	71.9512	54656.3	3.4003	12.599	1.60771	2.20826	2.14337	0.201784	1.41749	0.661338	1184.9	15.3426	1183.66	14.9809	1181.42	31.7866	1181.42	31.7866	100.294
WC12-2A-43	277.396	36090.2	2.53524	12.5428	1.26598	2.24049	2.05492	0.203815	1.61864	0.787691	1195.78	17.6664	1193.81	14.4273	1190.25	25.0122	1190.25	25.0122	100.465
WC12-2A-17	38.6694	24511.2	2.09903	12.4924	3.7721	2.32576	6.83478	0.210721	5.69961	0.833912	1232.66	63.9502	1220.18	48.569	1198.21	74.4156	1198.21	74.4156	102.875
WC12-2A-69	153.734	83862.1	1.76792	12.4405	0.700836	2.25724	1.235	0.203664	1.01688	0.823387	1194.97	11.0917	1199.05	8.69029	1206.41	13.8151	1206.41	13.8151	99.052
WC12-2A-32	290.691	241370	3.42461	12.4183	0.391921	2.36841	0.662408	0.213313	0.534025	0.806187	1246.44	6.05235	1233.12	4.72923	1209.93	7.71784	1209.93	7.71784	103.018
WC12-2A-30	89.8431	45958.4	2.46944	12.4097	1.59651	2.33055	1.73088	0.209757	0.668642	0.386302	1227.53	7.47362	1221.64	12.2987	1211.26	31.421	1211.26	31.421	101.343
WC12-2A-90	97.8762	115430	3.71113	12.3552	1.55574	2.34071	1.70903	0.209746	0.707431	0.413938	1227.47	7.90683	1224.74	12.1593	1219.93	30.5837	1219.93	30.5837	100.617
WC12-2A-62	42.6781	41673	1.35857	12.3068	1.45661	2.34582	1.70263	0.209383	0.881619	0.517798	1225.53	9.83958	1226.29	12.1217	1227.62	28.6166	1227.62	28.6166	99.8298
WC12-2A-4	149.964	92086.7	1.21155	12.2784	0.863244	2.39092	1.18193	0.212915	0.807325	0.683055	1244.33	9.1357	1239.88	8.46213	1232.19	16.9206	1232.19	16.9206	100.985
WC12-2A-20	48.6004	34032.6	2.82989	12.1522	2.62141	2.47397	2.88138	0.218046	1.19604	0.415094	1271.54	13.8023	1264.45	20.8381	1252.4	51.2861	1252.4	51.2861	101.529
WC12-2A-76	37.0273	52869.7	3.35284	12.1094	2.22397	2.49956	2.53727	0.219525	1.22136	0.481366	1279.36	14.1727	1271.91	18.4032	1259.34	43.4574	1259.34	43.4574	101.59
WC12-2A-112	60.9787	42843.1	1.7524	12.08	1.61168	2.52483	1.98017	0.221206	1.15047	0.580992	1288.24	13.4338	1279.21	14.4031	1264.09	31.4655	1264.09	31.4655	101.911
WC12-2A-52	73.8777	103675	1.411	12.0096	1.48606	2.4863	1.97881	0.216561	1.30664	0.660316	1263.68	14.9941	1268.05	14.3302	1275.46	28.9638	1275.46	28.9638	99.0761
WC12-2A-56	212.697	42352.9	2.21373	12.0092	0.61161	2.47523	1.64692	0.21559	1.52914	0.928487	1258.53	17.4827	1264.82	11.9112	1275.52	11.9094	1275.52	11.9094	98.6684
WC12-2A-44	62.9022	70111.8	2.65935	11.8056	1.51911	2.67791	1.8016	0.229288	0.968535	0.537598	1330.77	11.6456	1322.38	13.3201	1308.79	29.4872	1308.79	29.4872	101.679
WC12-2A-66	62.2141	147278	6.59666	11.71	2.05821	2.69199	2.20124	0.228628	0.780527	0.354585	1327.3	9.36301	1326.26	16.2985	1324.55	39.8646	1324.55	39.8646	100.208
WC12-2A-89	51.0319	31479.2	0.899975	11.6635	1.91309	2.7075	2.26452	0.229032	1.21167	0.535064	1329.42	14.5557	1330.52	16.7932	1332.26	37.015	1332.26	37.015	99.7872
WC12-2A-61	43.9897	50117.7	2.18329	11.5312	2.14604	2.76772	2.30362	0.23147	0.837375	0.363503	1342.2	10.1463	1346.88	17.1841	1354.3	41.3939	1354.3	41.3939	99.1067
WC12-2A-25	403.069	406962	1.67078	10.9201	0.323932	3.22466	0.816904	0.255393	0.749933	0.918019	1466.23	9.8349	1463.1	6.33138	1458.56	6.15894	1458.56	6.15894	100.526
KS12-2C Wilhite Fm.	U	206Pb	U/Th	206Pb*	±	207Pb*	±	206Pb*	±	error	206Pb*	±	207Pb*	±	206Pb*	±	Best age	±	Conc
	(ppm)	204Pb		207Pb*	(%)	235U*	(%)	238U	(%)	corr.	238U*	(Ma)	235U	(Ma)	207Pb*	(Ma)	(Ma)	(Ma)	(%)
KS12-2C-158	177.484	62696.7	0.823221	16.73	1.55919	0.810505	1.78726	0.0983447	0.87363	0.488809	604.701	5.04264	602.737	8.12426	595.372	33.7789	604.701	5.04264	101.567
KS12-2C-94	493.857	204626	1.61618	16.274	0.628566	0.916807	0.894457	0.108211	0.636364	0.711452	662.348	4.00564	660.67	4.34402	654.926	13.4853	662.348	4.00564	101.133
KS12-2C-12	64.3496	30410.7	1.66266	13.977	1.79318	1.63667	2.37889	0.165911	1.56322	0.657121	989.54	14.34	984.43	14.9948	973.071	36.5609	973.071	36.5609	101.692
KS12-2C-171	35.4761	11979.3	1.11653	13.9366	6.31824	1.63254	6.84005	0.165014	2.62031	0.383084	984.58	23.9256	982.839	43.0961	978.931	128.849	978.931	128.849	100.577
KS12-2C-63	48.9202	27180.5	1.75066	13.8436	2.19286	1.73697	2.50578	0.174397	1.21255	0.483902	1036.29	11.6076	1022.34	16.1485	992.596	44.5689	992.596	44.5689	104.402
KS12-2C-160	62.3512	25242.2	2.71304	13.7541	2.10308	1.62929	2.58951	0.162529	1.51085	0.583448	970.814	13.6165	981.585	16.2947	1005.73	42.6759	1005.73	42.6759	96.5279
KS12-2C-125	105.409	41915.5	1.77476	13.7149	1.69249	1.67394	1.96049	0.166507	0.98944	0.504691	992.838	9.10444	998.684	12.4625	1011.52	34.3337	1011.52	34.3337	98.1528
KS12-2C-36	49.846	27809.9	1.81946	13.6946	2.84453	1.63968	3.15189	0.162857	1.35758	0.430721	972.635	12.2565	985.591	19.8822	1014.54	57.6701	1014.54	57.6701	95.8698
KS12-2C-53	89.4317	31637.7	3.66011	13.6663	1.30219	1.77127	1.47908	0.175564	0.701417	0.474225	1042.69	6.7528	1034.99	9.59932	1018.72	26.3706	1018.72	26.3706	102.354
KS12-2C-62	74.1761	132620	2.43602	13.6568	1.27754	1.73056	1.61929	0.17141	0.99498	0.614454	1019.87	9.38554	1019.96	10.4209	1020.13	25.8671	1020.13	25.8671	99.9748
KS12-2C-7	108.024	60213.9	4.71513	13.6445	1.19882	1.7462	1.41489	0.172802	0.751505	0.531139	1027.53	7.13798	1025.76	9.1354	1021.96	24.2849	1021.96	24.2849	100.546
KS12-2C-103	170.911	194632	3.37368	13.6346	0.684755	1.76698	0.781177	0.174732	0.375963	0.481277	1038.13	3.60492	1033.41	5.06534	1023.42	13.8566	1023.42	13.8566	101.437
KS12-2C-55	27.8639	18172.5	1.21477	13.6103	4.30297	1.791	4.44524	0.176792	1.11563	0.250971	1049.42	10.8044	1042.19	28.9721	1027.03	87.0477	1027.03	87.0477	102.18
KS12-2C-98	46.9901	26605	1.88312	13.5916	2.56774	1.7657	2.86529	0.174055	1.27147	0.443748	1034.42	12.1513	1032.94	18.5763	1029.81	51.9261	1029.81	51.9261	100.447
KS12-2C-113	196.393	183061	1.83229	13.5871	0.886974	1.77475	1.10876	0.174889	0.665306	0.600043	1038.99	6.38419	1036.26	7.20094	1030.48	17.9483	1030.48	17.9483	100.826
KS12-2C-32	48.9499	50820.3	0.681805	13.5627	2.36578	1.76763	2.52698	0.173875	0.888117	0.351453	1033.42	8.48014	1033.65	16.389	1034.11	47.7898	1034.11	47.7898	99.9335
KS12-2C-128	84.2898	22498.3	2.32963	13.5515	5.77739	1.70475	6.07343	0.167551	1.87305	0.308401	998.601	17.3276	1010.32	38.8874	1035.79	116.768	1035.79	116.768	96.4101
KS12-2C-9	195.571	119115	6.80491	13.5385	0.717202	1.78163	0.826697	0.17494	0.411157	0.497349	1039.27	3.94638	1038.78	5.37649	1037.71	14.5011	1037.71	14.5011	100.15
KS12-2C-33	254.253	133052	1.96126	13.5273	0.807953	1.83282	1.11217	0.179817	0.76429	0.687205	1065.97	7.50917	1057.29	7.30651	1039.39	16.3291	1039.39	16.3291	102.558
KS12-2C-115	59.3687	94034.8	2.40971	13.5241	2.67695	1.87037	4.81876	0.183457	4.0068	0.831499	1085.83	40.0409	1070.66	31.8932	1039.87	54.065	1039.87	54.065	104.421
KS12-2C-5	680.223	336222	2.62398	13.5195	0.222301	1.82026	1.58949	0.178482	1.57386	0.990172	1058.67	15.3659	1052.78	10.4171	1040.55	4.50566	1040.55	4.50566	101.741
KS12-2C-129	105.544	95531.4	1.34766	13.4879	1.66784	1.76894	3.0236	0.173043	2.52199	0.834104	1028.86	23.9831	1034.13	19.6159	1045.32	33.6517	1045.32	33.6517	98.4254
KS12-2C-20	59.044	35726.5	1.14404	13.4823	2.80899	1.8508	3.01379	0.180977	1.09203	0.362343	1072.31	10.7878	1063.71	19.8697	1046.15	56.6662	1046.15	56.6662	102.5
KS12-2C-40	69.7845	46709.6	1.68954	13.4767	2.44344	1.85745	2.51867	0.181551	0.611006	0.24259	1075.44	6.05215	1066.08	16.6257	1046.99	49.2865	1046.99	49.2865	102.717
KS12-2C-111	76.0219	32498.7	0.703251	13.4198	1.34804	1.79991	1.51777	0.175184	0.697421	0.459504	1040.61	6.70196	1045.42	9.9073	1055.52	27.1673	1055.52	27.1673	98.5874
KS12-2C-74	14.6698	8281.94	0.919257	13.4108	8.03222	1.82989	8.39231	0.177983	2.43194	0.289782	1055.94	23.6871	1056.24	55.1561	1056.87	161.974	1056.87	161.974	99.9128
KS12-2C-22	124.34	92104.5	2.1926	13.3931	1.18862	1.92655	1.81795	0.187137	1.37554	0.756646	1105.85	13.9782	1090.34	12.1522	1059.53	23.9239	1059.53	23.9239	104.371
KS12-2C-24	93.2015	90735.2	2.43892	13.3888	1.42513	1.88431	1.84109	0.182975	1.1656	0.633103	1083.21	11.6221	1075.58	12.2134	1060.17	28.6862	1060.17	28.6862	102.173
KS12-2C-58	27.239	22076.1	0.986568	13.3854	4.36353	1.88091	4.67618	0.182598	1.68115	0.359514	1081.15	16.7334	1074.38	31.0095	1060.69	87.8481	1060.69	87.8481	101.93
KS12-2C-60	80.5714	57101.4	0.749162	13.3618	1.73316	1.83022	2.0741	0.177364	1.13931	0.549304	1052.56	11.0641	1056.36	13.6197	1064.23	34.8601	1064.23	34.8601	98.9034
KS12-2C-81	510.223	432395	4.09799	13.3343	0.27929	1.84777	0.831622	0.178697	0.783321	0.94192	1059.85	7.65551	1062.63	5.47902	1068.37	5.61389	1068.37	5.61389	99.203
KS12-2C-67	152.314	116186	7.10279	13.3301	1.0314	1.86903	1.20898	0.180696	0.630751	0.52172	1070.77	6.2228	1070.19	7.99724	1069.01	20.7238	1069.01	20.7238	100.165
KS12-2C-68	39.9802	34461.6	0.807012	13.3268	3.72636	1.87886	3.85164	0.181602	0.97434	0.252968	1075.72	9.65336	1073.66	25.5294	1069.5	74.9268	1069.5	74.9268	100.582
KS12-2C-18	75.5801	76084.8	1.66514	13.2892	1.12627	1.8251	1.45083	0.175907	0.914555	0.630368	1044.58	8.8194	1054.52	9.51725	1075.19	22.5973	1075.19	22.5973	97.153
KS12-2C-16	37.1913	35321.5	2.82925	13.2663	3.53249	1.93064	3.80822	0.185759	1.42267	0.37358	1098.36	14.3674	1091.76	25.4789	1078.64	70.9333	1078.64	70.9333	101.828
KS12-2C-84	203.128	97463.8	2.935	13.2055	0.980021	1.90554	1.13232	0.182505	0.567192	0.500911	1080.64	5.64312	1083.03	7.54047	1087.85	19.632	1087.85	19.632	99.3376
KS12-2C-61	164.541	228523	3.75186	13.1854	0.685328	1.8693	1.34047	0.17876	1.15203	0.859426	1060.2	11.2623	1070.28	8.86747	1090.87	13.7163	1090.87	13.7163	97.1878
KS12-2C-23	112.158	59320.6	2.84224	13.1796	1.73563	1.91389	3.26887	0.182944	2.77003	0.847398	1083.04	27.6159	1085.94	21.8041	1091.75	34.7469	1091.75	34.7469	99.2022
KS12-2C-77	136.278	105908	1.48291	13.1609	1.17294	1.95548	1.55106	0.186655	1.01489	0.654322	1103.23	10.2909	1100.33	10.4207	1094.63	23.4847	1094.63	23.4847	100.786
KS12-2C-3	94.8483	130908	2.55245	13.1331	1.61155	1.88681	1.98281	0.17972	1.15517	0.582594	1065.44	11.3444	1076.46	13.1597	1098.84	32.2462	1098.84	32.2462	96.9608
KS12-2C-173	31.1022	16152.4	1.34093	13.0822	3.25106	1.89743	3.54865	0.18003	1.42252	0.400862	1067.14	13.9904	1080.19	23.6007	1106.59	65.0093	1106.59	65.0093	96.4348
KS12-2C-83	32.4193	25817.1	2.89163	13.0253	3.73333	2.0675	3.87792	0.195314	1.04906	0.270522	1150.1	11.0503	1138.11	26.5454	1115.29	74.5512	1115.29	74.5512	103.121
KS12-2C-43	50.4	52479	2.26945	12.9998	2.29965	2.07031	2.40264	0.195196	0.695889	0.289636	1149.46	7.3264	1139.03	16.4516	1119.24	45.8607	1119.24	45.8607	102.7
KS12-2C-118	23.1346	26111.2	2.08384	12.987	6.44347	2.11942	6.94699	0.199629	2.5966	0.373774	1173.33	27.855	1155.15	47.9615	1121.22	128.616	1121.22	128.616	104.648
KS12-2C-86	395.206	148528	6.20914	12.9572	0.561823	2.00243	1.01621	0.188177	0.846777	0.833273	1111.49	8.64516	1116.33	6.88181	1125.77	11.2155	1125.77	11.2155	98.7313
KS12-2C-44	26.5565	16372.3	1.90009	12.9157	3.03527	2.11901	4.78795	0.198495	3.70291	0.773382	1167.23	39.5349	1155.01	33.0407	1132.18	60.4453	1132.18	60.4453	103.096
KS12-2C-34	109.265	136797	2.65308	12.8904	1.30527	2.07492	4.11026	0.193983	3.8975	0.948237	1142.92	40.8203	1140.56	28.1694	1136.09	25.9752	1136.09	25.9752	100.601
KS12-2C-172	43.45	47345.5	1.58279	12.8474	4.73391	2.1227	4.95103	0.197789	1.4501	0.292888	1163.43	15.4361	1156.21	34.186	1142.72	94.1563	1142.72	94.1563	101.813
KS12-2C-48	46.2842	72624.9	2.69749	12.8408	2.03276	2.0172	2.52048	0.187862	1.49021	0.591238	1109.78	15.1928	1121.32	17.112	1143.74	40.4152	1143.74	40.4152	97.0311
KS12-2C-46	63.6355	32760.5	1.61493	12.821	2.4787	2.15022	3.79187	0.199941	2.86955	0.756764	1175	30.8232	1165.12	26.2859	1146.79	49.2532	1146.79	49.2532	102.46
KS12-2C-29	193.947	147363	3.20408	12.8044	0.76498	2.12575	1.06417	0.197411	0.739777	0.695166	1161.4	7.86227	1157.21	7.34866	1149.35	15.1931	1149.35	15.1931	101.049
KS12-2C-27	60.2251	59008.4	1.92904	12.7947	2.29226	2.10376	2.84963	0.19522	1.6929	0.594078	1149.59	17.8249	1150.04	19.6146	1150.88	45.5158	1150.88	45.5158	99.8885
KS12-2c before 93	166.075	147892	2.93518	12.793	0.692878	2.09268	3.20677	0.194167	3.13102	0.976378	1143.91	32.8184	1146.41	22.036	1151.12	13.7387	1151.12	13.7387	99.3735
KS12-2C-96	96.9428	50358.3	3.80006	12.7866	1.7376	2.17096	1.85465	0.201329	0.648439	0.34963	1182.45	7.00538	1171.79	12.8936	1152.12	34.4962	1152.12	34.4962	102.633
KS12-2C-133	118.289	22081.4	2.29828	12.7816	3.73535	2.04575	4.29899	0.189642	2.12803	0.495006	1119.44	21.8683	1130.88	29.3275	1152.89	74.1671	1152.89	74.1671	97.0981
KS12-2C-75	36.7145	5690.14	2.88416	12.7711	3.8589	2.11792	4.64295	0.196171	2.58184	0.556076	1154.72	27.2955	1154.66	32.0341	1154.53	76.6143	1154.53	76.6143	100.016
KS12-2C-76	133.325	150808	1.97133	12.7598	1.03758	2.12664	1.16293	0.196805	0.525203	0.451621	1158.14	5.56749	1157.5	8.03172	1156.28	20.6047	1156.28	20.6047	100.161
KS12-2C-6	418.274	282820	1.42019	12.7361	0.361444	2.16546	0.863153	0.200026	0.783832	0.908102	1175.46	8.42242	1170.02	5.99565	1159.96	7.16641	1159.96	7.16641	101.336
KS12-2C-90	43.8684	55382.1	2.79932	12.7357	2.35027	2.20581	3.70466	0.203746	2.86369	0.772997	1195.41	31.2465	1182.89	25.8882	1160.03	46.628	1160.03	46.628	103.05
KS12-2C-17	54.6057	34106.5	1.7777	12.7305	1.95711	2.14165	2.26827	0.197739	1.14663	0.505509	1163.16	12.2032	1162.36	15.7018	1160.84	38.8067	1160.84	38.8067	100.2
KS12-2C-82	58.9002	44688.2	1.43118	12.7275	2.17112	2.14996	2.55285	0.19846	1.34287	0.526026	1167.04	14.3351	1165.04	17.6939	1161.31	43.0279	1161.31	43.0279	100.494
KS12-2C-25	102.27	94902.6	2.7838	12.7054	1.33091	2.17668	3.02591	0.200578	2.7175	0.898076	1178.42	29.2673	1173.62	21.0557	1164.75	26.3548	1164.75	26.3548	101.174
KS12-2C-165	34.9768	20757	2.57824	12.7023	2.14828	2.13319	2.36449	0.196523	0.987777	0.417755	1156.61	10.4585	1159.62	16.3474	1165.23	42.5841	1165.23	42.5841	99.2608
KS12-2C-65	88.1521	61380	1.38567	12.6947	1.77035	2.18906	1.94173	0.201548	0.797605	0.410771	1183.63	8.62469	1177.57	13.5344	1166.42	35.0726	1166.42	35.0726	101.475
KS12-2C-51	146.862	151857	1.06167	12.6818	0.634448	2.15941	2.49432	0.198616	2.41228	0.96711	1167.88	25.7681	1168.08	17.3122	1168.44	12.5841	1168.44	12.5841	99.952
KS12-2C-30	290.463	138333	1.72383	12.6787	0.5577	2.19361	2.36462	0.201712	2.29791	0.971789	1184.51	24.8648	1179.01	16.4933	1168.92	11.0627	1168.92	11.0627	101.333
KS12-2C-64	73.6943	92802.6	1.75352	12.6784	0.996643	2.16333	1.45977	0.198923	1.06659	0.730661	1169.53	11.408	1169.34	10.1369	1168.97	19.7555	1168.97	19.7555	100.048
KS12-2C-49	39.6224	40517.9	0.805935	12.6732	2.51808	2.11154	3.58426	0.194082	2.55072	0.711646	1143.45	26.726	1152.58	24.7024	1169.78	49.8584	1169.78	49.8584	97.7493
KS12-2C-8	197.672	381626	1.67174	12.6694	0.673423	2.17044	1.15967	0.199435	0.944103	0.814115	1172.28	10.1196	1171.62	8.06122	1170.37	13.351	1170.37	13.351	100.163
KS12-2C-42	338.963	236645	3.80145	12.6549	0.425787	2.24944	1.36651	0.206458	1.29848	0.950218	1209.92	14.3243	1196.61	9.60553	1172.68	8.44572	1172.68	8.44572	103.176
KS12-2C-66	208.806	135128	2.4044	12.6395	0.382315	2.1887	0.852394	0.20064	0.761847	0.893773	1178.76	8.20712	1177.45	5.94084	1175.08	7.58287	1175.08	7.58287	100.313
KS12-2C-28	275.564	226354	2.83879	12.6183	0.555918	2.2135	1.09735	0.202571	0.946112	0.862181	1189.12	10.2737	1185.32	7.67509	1178.41	11.0124	1178.41	11.0124	100.909
KS12-2C-41	62.3638	81274.9	2.74718	12.6096	1.24496	2.17566	1.53474	0.198972	0.897494	0.584787	1169.8	9.60138	1173.29	10.6767	1179.76	24.6158	1179.76	24.6158	99.1554
KS12-2C-50	34.4744	13970.8	1.75494	12.6083	3.76631	2.17838	4.7904	0.199199	2.9602	0.617945	1171.02	31.6985	1174.16	33.3492	1179.98	74.4944	1179.98	74.4944	99.2407
KS12-2C-116	841.904	891911	2.82141	12.5665	0.187192	2.25226	0.47648	0.205273	0.43817	0.919597	1203.58	4.81069	1197.49	3.3505	1186.54	3.67837	1186.54	3.67837	101.437
KS12-2C-105	91.1872	81221.6	1.90504	12.4991	1.42085	2.31887	1.8347	0.210211	1.16073	0.632655	1229.94	12.997	1218.08	13.0168	1197.14	28.0229	1197.14	28.0229	102.74
KS12-2C-69	118.572	126046	2.70139	12.497	1.44558	2.25367	2.35173	0.204266	1.85498	0.788772	1198.2	20.2831	1197.93	16.5414	1197.47	28.51	1197.47	28.51	100.061
KS12-2C-26	251.128	187755	1.96939	12.4074	0.431109	2.32219	0.722986	0.208967	0.580391	0.80277	1223.31	6.46699	1219.09	5.13141	1211.62	8.50318	1211.62	8.50318	100.965
KS12-2C-97	36.0256	26675.8	2.36921	12.3098	3.13188	2.38526	3.20165	0.212954	0.664766	0.207632	1244.54	7.52365	1238.19	22.9098	1227.14	61.5131	1227.14	61.5131	101.418
KS12-2C-15	44.7919	59934.2	1.94069	12.2868	3.8653	2.25289	3.95051	0.20076	0.816078	0.206575	1179.4	8.79573	1197.69	27.7883	1230.84	75.8891	1230.84	75.8891	95.8207
KS12-2C-45	262.482	91843.8	2.39371	12.2556	1.33565	2.18958	5.74394	0.194623	5.58649	0.972589	1146.37	58.6723	1177.73	40.0583	1235.84	26.1923	1235.84	26.1923	92.7607
KS12-2C-2	156.983	52688.9	3.70257	12.0124	1.02572	2.57769	2.27478	0.224574	2.0304	0.89257	1306	24.0036	1294.33	16.6432	1275	20.0043	1275	20.0043	102.431
KS12-2C-1	172.942	183494	1.56409	11.8146	1.14794	2.55081	2.07388	0.218573	1.72719	0.832833	1274.33	19.9713	1286.67	15.1285	1307.31	22.2875	1307.31	22.2875	97.4778
KS12-2C-38	105.408	63883.2	1.43041	11.7776	1.10332	2.65007	2.5813	0.226367	2.33362	0.904049	1315.43	27.768	1314.66	19.0316	1313.39	21.4025	1313.39	21.4025	100.155
KS12-2C-85	45.3566	31948.4	1.67517	11.7412	1.25974	2.70676	1.63516	0.230495	1.0425	0.637554	1337.09	12.5886	1330.31	12.1246	1319.39	24.4167	1319.39	24.4167	101.341
KS12-2C-35	174.55	86977.6	1.4607	11.7161	0.631512	2.73636	0.805873	0.232517	0.500624	0.621219	1347.68	6.08825	1338.39	5.99275	1323.55	12.2316	1323.55	12.2316	101.823
KS12-2C-104	86.2374	153833	1.20586	11.7022	1.03094	2.60862	2.94656	0.2214	2.76032	0.936795	1289.27	32.2553	1303.07	21.6312	1325.84	19.963	1325.84	19.963	97.2411
KS12-2C-153	47.7004	41544.1	1.68156	11.6717	2.36739	2.71946	3.00518	0.230205	1.8511	0.615969	1335.58	22.3299	1333.79	22.3138	1330.9	45.8152	1330.9	45.8152	100.352
5-2-1A Wilhite Fm.	U	206Pb	U/Th	206Pb*	±	207Pb*	±	206Pb*	±	error	206Pb*	±	207Pb*	±	206Pb*	±	Best age	±	Conc
	(ppm)	204Pb		207Pb*	(%)	235U*	(%)	238U	(%)	corr.	238U*	(Ma)	235U	(Ma)	207Pb*	(Ma)	(Ma)	(Ma)	(%)
5-2-1A-77	89.5459	33735	3.71152	14.2764	2.17258	1.53399	2.32395	0.158833	0.825004	0.355001	950.287	7.28943	944.099	14.2857	929.699	44.6158	929.699	44.6158	102.214
5-2-1A-56	142.299	157182	3.06306	14.2651	0.772012	1.52738	1.30383	0.158023	1.0507	0.805858	945.781	9.24277	941.446	8.00088	931.3	15.8306	931.3	15.8306	101.555
5-2-1A-92	71.3099	37864.2	1.91676	14.1928	1.699	1.59763	2.07743	0.164453	1.19546	0.575452	981.476	10.8837	969.282	12.9742	941.757	34.8311	941.757	34.8311	104.218
5-2-1A-16	137.221	92679.8	2.51175	14.0525	1.19418	1.59533	1.54468	0.162593	0.979775	0.634291	971.172	8.83323	968.385	9.64137	962.083	24.4144	962.083	24.4144	100.945
5-2-1A-107	84.1772	66058.4	2.27413	13.9646	1.0914	1.63737	1.27298	0.165834	0.65523	0.514721	989.114	6.00825	984.699	8.02484	974.85	22.2401	974.85	22.2401	101.463
5-2-1A-110	60.0512	30211.3	2.27921	13.9284	1.63347	1.58819	2.23844	0.160437	1.53049	0.683728	959.203	13.6405	965.588	13.9479	980.132	33.2711	980.132	33.2711	97.8647
5-2-1A-129	100.516	118380	1.46631	13.9249	2.10569	1.63899	2.20051	0.165527	0.638981	0.290379	987.421	5.84997	985.326	13.8777	980.643	42.8951	980.643	42.8951	100.691
5-2-1A-127	54.5182	88648.9	1.45636	13.8367	3.65824	1.59802	4.06657	0.160366	1.77603	0.436739	958.812	15.8229	969.437	25.4032	993.58	74.3892	993.58	74.3892	96.5008
5-2-1A-3	171.452	57888.5	56.0534	13.7317	0.540166	1.70761	0.980108	0.170064	0.817822	0.83442	1012.47	7.66268	1011.39	6.27642	1009.04	10.9549	1009.04	10.9549	100.339
5-2-1A-135	314.215	101293	7.46385	13.669	0.559169	1.74783	1.04235	0.173275	0.879676	0.843933	1030.13	8.37486	1026.36	6.73226	1018.32	11.3246	1018.32	11.3246	101.16
5-2-1A-126	53.4245	32999.8	0.72638	13.6651	2.48352	1.73207	2.59879	0.171662	0.765375	0.294513	1021.26	7.22879	1020.52	16.7307	1018.9	50.2981	1018.9	50.2981	100.232
5-2-1A-131	55.4699	27781.3	1.36649	13.5566	1.56844	1.79168	2.20753	0.17616	1.55345	0.703704	1045.96	14.9988	1042.44	14.3867	1035.03	31.7041	1035.03	31.7041	101.057
5-2-1A-34	50.4651	40852.4	1.6724	13.4809	2.32101	1.8222	2.53396	0.178161	1.01679	0.401266	1056.92	9.91195	1053.48	16.6141	1046.36	46.8312	1046.36	46.8312	101.009
5-2-1A-97	72.0657	29831.6	2.56961	13.4531	1.67202	1.83606	1.90719	0.179146	0.917439	0.481044	1062.31	8.98536	1058.45	12.5377	1050.52	33.7179	1050.52	33.7179	101.122
5-2-1A-95	380.746	146134	1.70105	13.3863	0.549702	1.76106	0.886621	0.170975	0.695647	0.784604	1017.48	6.54775	1031.24	5.7421	1060.55	11.0617	1060.55	11.0617	95.939
5-2-1A-102	889.778	32300.1	3.27031	13.3578	0.20954	1.87473	0.56714	0.181623	0.527012	0.929244	1075.84	5.22193	1072.2	3.75547	1064.84	4.21421	1064.84	4.21421	101.033
5-2-1A-19	76.0069	126446	1.75242	13.2764	2.43422	1.89345	2.82257	0.182319	1.42879	0.506203	1079.63	14.2031	1078.79	18.7569	1077.12	48.8818	1077.12	48.8818	100.233
5-2-1A-65	833.808	163185	9.20386	13.2725	0.388508	1.9107	0.960885	0.183926	0.878841	0.914616	1088.39	8.80132	1084.83	6.40475	1077.71	7.7942	1077.71	7.7942	100.991
5-2-1A-117	25.9746	29418.5	1.25904	13.2513	4.72531	1.87504	5.91896	0.180206	3.56449	0.602215	1068.1	35.0857	1072.31	39.2155	1080.9	94.8608	1080.9	94.8608	98.8162
5-2-1A-81	59.7369	53335.9	0.597009	13.1985	3.15348	1.90811	3.38001	0.182653	1.21658	0.359935	1081.45	12.1124	1083.93	22.5223	1088.91	63.2055	1088.91	63.2055	99.3144
5-2-1A-111	193.354	87474.1	8.44996	13.1967	0.576895	1.92235	1.96059	0.183991	1.8738	0.95573	1088.74	18.7711	1088.88	13.0961	1089.2	11.5563	1089.2	11.5563	99.958
5-2-1A-120	146.996	9711.08	1.62166	13.1909	1.39104	1.88789	2.09131	0.180613	1.5616	0.746707	1070.32	15.4003	1076.84	13.8826	1090.05	27.8708	1090.05	27.8708	98.1898
5-2-1A-132	62.0924	81017.6	0.904155	13.1286	2.49508	1.92651	2.65275	0.183438	0.90092	0.339617	1085.73	9.0022	1090.33	17.7334	1099.51	49.9052	1099.51	49.9052	98.7465
5-2-1A-70	33.7712	10663.5	1.99619	13.096	3.72928	1.97911	3.98223	0.187978	1.39663	0.350716	1110.41	14.2462	1108.42	26.8683	1104.49	74.5982	1104.49	74.5982	100.536
5-2-1A-48	92.6341	62128.7	1.99949	13.0668	2.08124	1.99085	2.26428	0.188671	0.891856	0.39388	1114.17	9.12551	1112.41	15.3051	1108.95	41.5778	1108.95	41.5778	100.471
5-2-1A-94	111.44	40051.5	2.18114	13.046	0.862318	1.99261	1.43433	0.188537	1.14617	0.799098	1113.45	11.7206	1113.01	9.69758	1112.14	17.2201	1112.14	17.2201	100.118
5-2-1A-101	31.3542	19213.5	1.09495	13.0148	5.43213	1.98083	5.82246	0.186975	2.09594	0.359976	1104.97	21.2834	1109	39.3064	1116.94	108.473	1116.94	108.473	98.9279
5-2-1A-139	74.9922	28297.2	2.6082	12.9499	2.04595	2.09693	2.2124	0.196947	0.8419	0.380536	1158.9	8.93005	1147.8	15.2118	1126.87	40.7639	1126.87	40.7639	102.842
5-2-1A-26	32.8472	33453.7	2.14992	12.943	3.39856	2.06245	3.85926	0.193605	1.82859	0.473817	1140.88	19.1201	1136.43	26.3965	1127.97	67.7082	1127.97	67.7082	101.144
5-2-1A-83	86.0605	54172.8	2.06736	12.9359	1.194	2.06425	1.6838	0.193667	1.18724	0.705096	1141.21	12.4174	1137.03	11.518	1129.06	23.7652	1129.06	23.7652	101.076
5-2-1A-138	45.2565	32238.4	2.24151	12.9307	2.45134	2.12688	3.11368	0.199463	1.91989	0.616598	1172.43	20.5813	1157.57	21.5081	1129.86	48.8426	1129.86	48.8426	103.768
5-2-1A-32	37.497	38032	1.75397	12.9186	2.64721	2.11346	3.09162	0.198018	1.597	0.516559	1164.67	17.0164	1153.2	21.3123	1131.74	52.7243	1131.74	52.7243	102.91
5-2-1A-64	203.231	40000.9	14.018	12.9114	0.684466	2.0853	1.18082	0.195272	0.962206	0.814863	1149.87	10.1335	1143.98	8.1039	1132.85	13.6157	1132.85	13.6157	101.503
5-2-1A-66	46.8163	55020.2	1.05815	12.8987	2.73578	1.94161	3.1287	0.181639	1.51798	0.48518	1075.92	15.0421	1095.56	20.9716	1134.76	54.4675	1134.76	54.4675	94.8146
5-2-1A-42	20.7098	11747.4	1.81955	12.8718	5.21556	2.03616	5.64254	0.190085	2.15319	0.381599	1121.84	22.1703	1127.68	38.4414	1138.96	103.806	1138.96	103.806	98.4964
5-2-1A-47	48.436	56999.8	2.3846	12.8511	4.21318	2.08562	4.39429	0.19439	1.24855	0.28413	1145.11	13.0994	1144.09	30.1675	1142.14	83.7778	1142.14	83.7778	100.261
5-2-1A-114	175.588	203933	2.54409	12.7973	1.00601	2.12515	1.2807	0.197246	0.79254	0.618835	1160.51	8.41713	1157.01	8.84312	1150.48	19.9601	1150.48	19.9601	100.871
5-2-1A-25	126.033	143224	2.28047	12.794	1.30647	2.1095	1.41859	0.195743	0.55274	0.389641	1152.41	5.83294	1151.91	9.77213	1151	25.9537	1151	25.9537	100.122
5-2-1A-27	72.5397	47297.1	3.45885	12.7883	1.73305	2.10611	1.84143	0.19534	0.622407	0.338002	1150.24	6.55682	1150.8	12.6786	1151.85	34.4066	1151.85	34.4066	99.8602
5-2-1A-17	95.4395	74472.8	2.34717	12.7806	1.01184	2.12356	1.3377	0.19684	0.87499	0.654102	1158.32	9.27681	1156.49	9.23451	1153.05	20.0922	1153.05	20.0922	100.457
5-2-1A-93	40.1943	33150	1.83773	12.7728	2.40804	2.12516	2.64571	0.196868	1.09597	0.414243	1158.47	11.621	1157.01	18.27	1154.26	47.798	1154.26	47.798	100.364
5-2-1A-37	66.7463	48220.9	2.35524	12.7591	1.42989	2.08344	1.72901	0.192796	0.972059	0.562204	1136.51	10.1285	1143.37	11.863	1156.39	28.3694	1156.39	28.3694	98.2805
5-2-1A-96	54.9271	36852.2	2.33731	12.7591	1.91012	2.15315	2.82531	0.199247	2.08178	0.736833	1171.27	22.2966	1166.07	19.592	1156.39	37.8935	1156.39	37.8935	101.287
5-2-1A-53	105.23	109046	1.42417	12.7585	1.08898	2.09656	1.26803	0.194002	0.649635	0.512317	1143.02	6.80438	1147.68	8.71765	1156.48	21.6242	1156.48	21.6242	98.8361
5-2-1A-128	91.7762	82503	1.74577	12.7297	1.37938	2.14599	1.61358	0.198126	0.83723	0.518865	1165.25	8.92489	1163.76	11.1766	1160.97	27.3675	1160.97	27.3675	100.368
5-2-1A-71	122.051	137475	1.55386	12.7	0.785597	2.13596	1.03471	0.196741	0.673389	0.650803	1157.79	7.13641	1160.52	7.15611	1165.6	15.5728	1165.6	15.5728	99.33
5-2-1A-22	46.4285	47632.7	1.65876	12.6897	2.70945	2.14506	2.77037	0.197419	0.577779	0.208557	1161.44	6.14078	1163.46	19.188	1167.2	53.688	1167.2	53.688	99.5068
5-2-1A-4	53.4846	30032	1.32014	12.6851	1.85769	2.13605	2.02564	0.196518	0.807579	0.398679	1156.59	8.55041	1160.55	14.0103	1167.93	36.7771	1167.93	36.7771	99.0293
5-2-1A-11	64.7156	55399.9	2.42958	12.685	1.93713	2.17444	2.09241	0.200049	0.791014	0.378039	1175.59	8.50042	1172.9	14.5542	1167.93	38.3744	1167.93	38.3744	100.655
5-2-1A-115	47.2386	50343.2	2.00148	12.6725	2.6672	2.16895	3.53699	0.199348	2.32301	0.656774	1171.82	24.8907	1171.14	24.5857	1169.88	52.8012	1169.88	52.8012	100.166
5-2-1A-51	413.102	341504	2.39911	12.6674	0.293394	2.1674	0.584043	0.199125	0.505001	0.864664	1170.62	5.40593	1170.65	4.05801	1170.72	5.82759	1170.72	5.82759	99.991
5-2-1A-109	251.52	191262	2.85338	12.6321	0.658637	2.19935	1.1946	0.201497	0.996629	0.834277	1183.35	10.7745	1180.84	8.33864	1176.25	13.0479	1176.25	13.0479	100.604
5-2-1A-125	98.0488	106539	3.42226	12.6307	1.11972	2.19931	1.66811	0.201472	1.23646	0.741232	1183.22	13.3659	1180.83	11.6441	1176.46	22.1685	1176.46	22.1685	100.575
5-2-1A-31	754.649	292483	5.55195	12.6306	0.505747	2.15866	1.43469	0.197746	1.34259	0.935806	1163.2	14.2891	1167.84	9.95593	1176.47	10.0221	1176.47	10.0221	98.8719
5-2-1A-23	24.0073	15950.1	1.27093	12.6259	4.88834	2.1248	5.1725	0.194571	1.69082	0.326887	1146.09	17.7534	1156.9	35.7277	1177.22	96.7318	1177.22	96.7318	97.3554
5-2-1A-45	243.096	180633	2.93993	12.6183	0.498359	2.17659	0.830203	0.199194	0.663984	0.799786	1170.99	7.1099	1173.59	5.7761	1178.4	9.87321	1178.4	9.87321	99.3709
5-2-1A-41	562.608	22519.4	2.30925	12.5985	0.682931	2.17972	0.970114	0.199168	0.689004	0.71023	1170.85	7.37699	1174.59	6.7526	1181.5	13.5152	1181.5	13.5152	99.0984
5-2-1A-55	51.1426	46804.3	1.31065	12.5656	2.98252	2.24133	3.10364	0.204261	0.85857	0.276633	1198.17	9.38771	1194.07	21.7947	1186.68	58.9223	1186.68	58.9223	100.968
5-2-1A-105	112.875	26373.3	1.17149	12.5617	1.73251	2.29101	3.31237	0.208725	2.82316	0.852307	1222.02	31.4271	1209.52	23.4177	1187.29	34.2195	1187.29	34.2195	102.925
5-2-1A-67	113.562	133916	2.8507	12.5452	0.898265	2.21252	1.28548	0.201309	0.919551	0.715338	1182.35	9.93351	1185.01	8.98975	1189.89	17.7338	1189.89	17.7338	99.3661
5-2-1A-13	352.058	32405.5	1.66756	12.5143	0.44653	2.21919	1.11427	0.201418	1.02088	0.916192	1182.93	11.0331	1187.11	7.79965	1194.74	8.79224	1194.74	8.79224	99.012
5-2-1A-21	170.419	10245.6	1.72636	12.4792	1.31625	2.26022	2.48164	0.204567	2.10381	0.84775	1199.81	23.032	1199.97	17.4709	1200.26	25.9294	1200.26	25.9294	99.9627
5-2-1A-33	330.831	53384.2	11.1613	12.4207	0.49694	2.20869	0.741947	0.198966	0.550941	0.742561	1169.76	5.89379	1183.8	5.18577	1209.53	9.78281	1209.53	9.78281	96.7119
5-2-1A-57	313.746	144963	1.22403	12.2688	0.412243	2.34302	0.563079	0.208486	0.383554	0.681173	1220.75	4.2656	1225.44	4.00717	1233.72	8.10603	1233.72	8.10603	98.9484
5-2-1A-119	641.539	333839	2.44091	12.1758	0.174412	2.44897	0.920072	0.216261	0.90339	0.981868	1262.09	10.3549	1257.12	6.63364	1248.62	3.43298	1248.62	3.43298	101.079
5-2-1A-35	94.3168	111764	3.62312	12.1725	1.14384	2.45988	1.76281	0.217166	1.34132	0.7609	1266.88	15.4275	1260.33	12.7266	1249.14	22.408	1249.14	22.408	101.42
5-2-1A-52	83.9007	65978.2	3.13698	11.8932	1.68352	2.62869	10.1363	0.226744	9.99554	0.986111	1317.41	119.112	1308.7	74.6934	1294.43	32.744	1294.43	32.744	101.776
5-2-1A-79	79.0463	64600.4	1.26171	11.8534	1.44587	2.58758	2.07951	0.22245	1.4946	0.718725	1294.81	17.5325	1297.13	15.2305	1300.95	28.0964	1300.95	28.0964	99.5281
5-2-1A-49	49.2298	42506.5	3.42655	11.8452	1.61324	2.6917	2.11052	0.231242	1.36079	0.644765	1341.01	16.4753	1326.18	15.6262	1302.29	31.3428	1302.29	31.3428	102.973
5-2-1A-124	95.8128	78554.8	2.29147	11.7263	1.19456	2.68269	1.48435	0.228155	0.881087	0.593586	1324.82	10.5515	1323.7	10.9796	1321.85	23.1452	1321.85	23.1452	100.225
5-2-1A-54	29.1137	33763.7	0.524697	11.7192	2.36613	2.70637	2.66887	0.23003	1.23461	0.462599	1334.66	14.884	1330.21	19.7902	1323.03	45.8412	1323.03	45.8412	100.879
5-2-1A-122	77.7228	48852.8	0.871766	11.7097	1.30077	2.71374	1.57924	0.230468	0.895551	0.567076	1336.95	10.8131	1332.22	11.718	1324.61	25.1934	1324.61	25.1934	100.932
5-2-1A-40	75.1494	149710	2.18473	11.7	0.88979	2.70101	3.68213	0.229198	3.573	0.970363	1330.3	42.9484	1328.74	27.2923	1326.2	17.2297	1326.2	17.2297	100.309
5-2-1A-76	251.53	325138	8.45591	11.6925	0.519178	2.68647	1.3214	0.227819	1.21513	0.919581	1323.06	14.5344	1324.74	9.77795	1327.44	10.0511	1327.44	10.0511	99.6697
5-2-1A-58	95.3195	129230	1.6711	11.6625	1.0556	2.71847	1.15503	0.229941	0.468827	0.405902	1334.19	5.65018	1333.51	8.57417	1332.42	20.4212	1332.42	20.4212	100.133
5-2-1A-75	257.802	78344.2	2.25172	11.6544	0.541933	2.69361	2.92127	0.22768	2.87056	0.982642	1322.33	34.3186	1326.7	21.6347	1333.76	10.4826	1333.76	10.4826	99.1433
5-2-1A-72	128.688	163666	1.54492	11.5856	1.03246	2.74432	1.31089	0.230595	0.807755	0.616187	1337.62	9.75739	1340.55	9.756	1345.21	19.9378	1345.21	19.9378	99.4355
5-2-1A-104	150.22	135319	2.04388	11.3942	0.753783	2.91134	1.15207	0.240589	0.871247	0.756246	1389.76	10.892	1384.86	8.70735	1377.31	14.4922	1377.31	14.4922	100.904
5-2-1A-44	138.876	135778	3.37189	11.3638	0.873738	2.91865	1.46073	0.240549	1.1706	0.801383	1389.55	14.6325	1386.76	11.0475	1382.44	16.7865	1382.44	16.7865	100.515
5-2-1A-20	180.226	212624	1.61164	11.2844	0.635317	2.93626	0.740019	0.240311	0.379473	0.512788	1388.31	4.7396	1391.31	5.60516	1395.89	12.1824	1395.89	12.1824	99.4571
5-2-1A-116	20.6064	24695.6	1.60842	11.1391	5.14639	3.09758	5.35125	0.250249	1.46648	0.274044	1439.76	18.9222	1432.09	41.0977	1420.7	98.4153	1420.7	98.4153	101.342
5-2-1A-12	81.1666	65601.5	3.47733	11.1047	0.696206	3.05191	1.06984	0.245798	0.812319	0.759288	1416.77	10.3318	1420.71	8.18223	1426.61	13.2944	1426.61	13.2944	99.31
5-2-1A-36	263.703	219974	2.70302	11.0457	0.284807	3.14886	0.890452	0.252258	0.843677	0.94747	1450.11	10.9558	1444.72	6.86234	1436.79	5.43098	1436.79	5.43098	100.927
5-2-1A-98	81.4606	162329	2.19055	10.9642	0.886534	3.1564	1.28406	0.250996	0.928905	0.723413	1443.61	12.0144	1446.56	9.90155	1450.89	16.8734	1450.89	16.8734	99.498
5-2-1A-73	47.3666	33315.6	1.63232	10.9264	1.72656	3.22737	1.93965	0.255755	0.883868	0.455685	1468.09	11.6045	1463.75	15.0371	1457.45	32.8344	1457.45	32.8344	100.73
5-2-1A-68	91.4694	209257	1.90439	10.9139	1.06069	3.23303	1.66993	0.25591	1.28981	0.772374	1468.88	16.9424	1465.12	12.9512	1459.64	20.1645	1459.64	20.1645	100.633
5-2-1A-60	211.004	265113	0.823972	10.8872	0.31265	3.23946	0.98706	0.255793	0.936236	0.94851	1468.28	12.2935	1466.65	7.6585	1464.28	5.93985	1464.28	5.93985	100.273
5-2-1A-112	120.256	169286	1.37438	10.8255	0.539372	3.2565	2.81577	0.255681	2.76362	0.981482	1467.71	36.2762	1470.73	21.8772	1475.07	10.2324	1475.07	10.2324	99.5009
5-2-1A-69	205.106	39563.7	2.52426	10.8034	0.635932	3.28622	2.32083	0.257488	2.23201	0.961727	1476.97	29.4625	1477.79	18.0693	1478.95	12.058	1478.95	12.058	99.8663
5-2-1A-106	61.6522	80258.2	1.63025	9.71014	1.05573	4.1898	1.23085	0.295064	0.632792	0.514108	1666.79	9.29406	1672.03	10.0901	1678.59	19.5016	1678.59	19.5016	99.297
PF12-1 Shields Fm.	U	206Pb	U/Th	206Pb*	±	207Pb*	±	206Pb*	±	error	206Pb*	±	207Pb*	±	206Pb*	±	Best age	±	Conc
	(ppm)	204Pb		207Pb*	(%)	235U*	(%)	238U	(%)	corr.	238U*	(Ma)	235U	(Ma)	207Pb*	(Ma)	(Ma)	(Ma)	(%)
PF12-1-23	38.8402	10897.9	1.23439	16.177	6.29382	0.880374	6.51652	0.103291	1.68906	0.259197	633.668	10.1938	641.184	30.9887	667.759	134.841	633.668	10.1938	94.8946
PF12-1-4	72.3289	47009	1.70497	14.11	1.90761	1.56854	2.67098	0.160518	1.86954	0.699945	959.653	16.6696	957.851	16.5634	953.706	39.0093	953.706	39.0093	100.624
PF12-1-20	106.559	108723	2.14031	14.0962	1.6269	1.60826	1.81529	0.164421	0.805279	0.44361	981.3	7.33015	973.43	11.3658	955.691	33.2465	955.691	33.2465	102.68
PF12-1-121	693.001	356335	9.69737	14.0568	0.245078	1.57197	0.927777	0.160261	0.894823	0.96448	958.229	7.96762	959.202	5.7578	961.453	5.02431	961.453	5.02431	99.6647
PF12-1-135	110.357	71431.7	2.8336	14.0419	1.86953	1.58521	2.05554	0.16144	0.854477	0.415694	964.773	7.65654	964.418	12.7988	963.627	38.177	963.627	38.177	100.119
PF12-1-64	76.2283	45529.2	2.50274	14.0324	2.14113	1.59092	2.221	0.161913	0.590253	0.26576	967.397	5.30229	966.658	13.8484	964.998	43.7028	964.998	43.7028	100.249
PF12-1-28	52.9532	34267.8	1.44577	13.9408	1.56427	1.59158	2.26828	0.160922	1.64261	0.724163	961.897	14.6779	966.917	14.1455	978.343	31.8635	978.343	31.8635	98.3189
PF12-1-40	56.3683	129691	2.04176	13.9385	2.61637	1.71233	3.00852	0.173101	1.48518	0.493658	1029.17	14.1274	1013.16	19.2876	978.668	53.3042	978.668	53.3042	105.161
PF12-1-35	69.5525	57637.4	1.0735	13.8652	2.73121	1.65338	2.8825	0.166263	0.921574	0.319713	991.491	8.46932	990.845	18.2398	989.396	55.5776	989.396	55.5776	100.212
PF12-1-26	81.419	46308.8	1.83445	13.8402	1.25902	1.64993	2.28382	0.165617	1.90544	0.834322	987.915	17.4527	989.523	14.4395	993.104	25.5789	993.104	25.5789	99.4775
PF12-1-79	180.072	74044.2	0.863174	13.8309	0.840987	1.66307	0.908927	0.166825	0.344803	0.379351	994.593	3.17793	994.548	5.76357	994.467	17.0934	994.467	17.0934	100.013
PF12-1-136	58.1652	27110.8	0.624729	13.7954	2.13681	1.69162	2.30805	0.169252	0.872439	0.377998	1007.99	8.14104	1005.37	14.7297	999.658	43.4017	999.658	43.4017	100.834
PF12-1-29	26.6811	14295.4	0.698161	13.7898	2.66273	1.69528	2.94492	0.16955	1.25794	0.427157	1009.63	11.756	1006.75	18.8101	1000.48	54.1009	1000.48	54.1009	100.915
PF12-1-54	78.0464	47153.4	2.36313	13.7703	2.58662	1.67049	2.80663	0.166834	1.08931	0.388121	994.642	10.0403	997.371	17.8284	1003.36	52.5296	1003.36	52.5296	99.1315
PF12-1-69	31.0188	27662.2	1.56823	13.7525	4.36772	1.59042	5.06331	0.158633	2.56128	0.505851	949.173	22.606	966.46	31.5752	1005.97	88.6495	1005.97	88.6495	94.3542
PF12-1-12	116.319	108079	1.26851	13.7285	1.1106	1.64781	1.53498	0.16407	1.05959	0.690296	979.353	9.62734	988.713	9.6999	1009.52	22.5148	1009.52	22.5148	97.0114
PF12-1-114	31.0205	23961.3	0.803306	13.7185	2.83483	1.80382	3.29857	0.179473	1.68651	0.511284	1064.09	16.5431	1046.84	21.5508	1011	57.4972	1011	57.4972	105.252
PF12-1-24	356.881	186262	1.61996	13.7099	0.533672	1.71365	0.783252	0.170395	0.573305	0.731954	1014.29	5.38056	1013.65	5.02231	1012.27	10.8183	1012.27	10.8183	100.199
PF12-1-62	65.8454	116531	1.3773	13.6892	1.6769	1.76801	2.1461	0.175534	1.33931	0.624068	1042.53	12.8922	1033.79	13.9195	1015.34	33.9786	1015.34	33.9786	102.678
PF12-1-84	115.51	61788.8	5.39292	13.6471	0.917389	1.70519	1.41788	0.168776	1.0811	0.762479	1005.36	10.0639	1010.48	9.0752	1021.57	18.5707	1021.57	18.5707	98.4139
PF12-1-5	41.8903	23613.4	1.58528	13.6193	3.9036	1.72665	4.43437	0.170552	2.1037	0.474408	1015.15	19.7593	1018.5	28.5201	1025.69	78.9952	1025.69	78.9952	98.9723
PF12-1-148	89.6534	39648.3	2.93856	13.5943	1.42103	1.74704	1.50913	0.17225	0.508105	0.336686	1024.5	4.81295	1026.07	9.74561	1029.41	28.75	1029.41	28.75	99.5232
PF12-1-25	20.6091	10442.6	0.653424	13.5406	5.20556	1.76472	5.3889	0.173306	1.39367	0.258618	1030.3	13.2703	1032.58	34.9403	1037.4	105.175	1037.4	105.175	99.3156
PF12-1-66	101.959	56121.9	1.22026	13.5159	1.64946	1.75497	1.70558	0.172033	0.433933	0.254419	1023.31	4.10596	1029	11.0325	1041.1	33.3112	1041.1	33.3112	98.2909
PF12-1-2	77.6802	96006.8	0.875374	13.4794	1.812	1.77053	2.07966	0.173091	1.02061	0.490759	1029.12	9.70781	1034.72	13.4955	1046.58	36.5432	1046.58	36.5432	98.3316
PF12-1-39	16.4557	12737.1	0.094985	13.4756	7.21648	1.70874	7.74937	0.167002	2.82404	0.364422	995.574	26.0521	1011.81	49.6765	1047.15	145.694	1047.15	145.694	95.0747
PF12-1-21	108.422	158891	1.51923	13.4443	1.33878	1.85217	1.76479	0.1806	1.14985	0.651553	1070.25	11.339	1064.2	11.6372	1051.84	26.9864	1051.84	26.9864	101.75
PF12-1-76	182.885	161839	3.84039	13.4369	1.12831	1.81582	1.42689	0.176959	0.873457	0.612142	1050.34	8.46585	1051.18	9.34329	1052.95	22.751	1052.95	22.751	99.752
PF12-1-74	34.4917	49274	1.39833	13.4363	5.73485	1.74466	6.15087	0.170016	2.22366	0.36152	1012.2	20.8298	1025.19	39.7201	1053.04	115.644	1053.04	115.644	96.1219
PF12-1-14	72.4966	48781.1	1.31271	13.4046	1.99404	1.82466	2.10133	0.177393	0.662844	0.315441	1052.71	6.43789	1054.36	13.7837	1057.8	40.1472	1057.8	40.1472	99.5196
PF12-1-32	50.8912	27388.7	1.01032	13.3985	2.69209	1.86667	2.87824	0.181394	1.01829	0.353791	1074.58	10.0791	1069.35	19.0326	1058.71	54.1981	1058.71	54.1981	101.499
PF12-1-72	45.3415	33258.2	1.94013	13.3848	2.3342	1.87279	2.53521	0.181803	0.989335	0.390238	1076.82	9.81109	1071.52	16.783	1060.77	46.9764	1060.77	46.9764	101.513
PF12-1-10	138.559	170381	3.01053	13.3136	0.748532	1.8769	1.06539	0.181232	0.758133	0.711598	1073.7	7.49832	1072.97	7.0577	1071.49	15.0278	1071.49	15.0278	100.206
PF12-1-137	34.1308	19964.6	1.48187	13.2866	4.49149	1.83432	4.82328	0.176761	1.75799	0.36448	1049.26	17.0229	1057.83	31.7059	1075.58	90.2051	1075.58	90.2051	97.553
PF12-1-75	111.383	77383.5	0.903978	13.2796	1.95484	1.90082	2.46301	0.183073	1.49834	0.608336	1083.74	14.9466	1081.38	16.3891	1076.64	39.2658	1076.64	39.2658	100.66
PF12-1-16	92.7265	65880.4	1.14715	13.2394	0.682022	1.85949	1.73859	0.17855	1.59923	0.919843	1059.05	15.6186	1066.81	11.4802	1082.69	13.6616	1082.69	13.6616	97.8161
PF12-1-150	47.833	29628.2	1.6728	13.2358	2.6843	1.91339	2.91237	0.183677	1.12981	0.387935	1087.03	11.3017	1085.77	19.4238	1083.22	53.8613	1083.22	53.8613	100.352
PF12-1-85	29.834	23615.4	2.45616	13.2259	4.93617	2.00924	5.13456	0.192732	1.41347	0.275285	1136.16	14.7237	1118.63	34.824	1084.76	99.0442	1084.76	99.0442	104.738
PF12-1-49	90.8287	39806.8	7.77479	13.1815	1.07484	1.86316	1.35823	0.178121	0.830359	0.611356	1056.7	8.093	1068.11	8.97465	1091.46	21.5108	1091.46	21.5108	96.8155
PF12-1-83	31.4159	16262.8	1.41996	13.1067	3.47291	2.07561	3.62578	0.197304	1.04172	0.287308	1160.82	11.0662	1140.79	24.8503	1102.86	69.4844	1102.86	69.4844	105.256
PF12-1-3	56.8796	33953.6	1.68065	13.0618	2.50016	1.94314	3.0394	0.184079	1.72834	0.568646	1089.22	17.321	1096.08	20.3784	1109.72	49.9319	1109.72	49.9319	98.1531
PF12-1-144	25.1405	12162.6	1.26642	12.9988	3.5854	2.09648	4.02461	0.197649	1.82823	0.454261	1162.68	19.4497	1147.65	27.6748	1119.4	71.5342	1119.4	71.5342	103.866
PF12-1-149	110.207	88473.8	2.12775	12.9765	0.981103	2.01651	3.00115	0.189783	2.83626	0.945056	1120.2	29.1646	1121.09	20.3738	1122.82	19.5605	1122.82	19.5605	99.7663
PF12-1-70	50.8335	63480.3	2.74798	12.9452	3.68792	2.06453	3.77347	0.193834	0.798912	0.211718	1142.11	8.36188	1137.12	25.8179	1127.59	73.4831	1127.59	73.4831	101.288
PF12-1-53	61.3466	73869	2.38935	12.9136	2.31461	2.06597	2.47658	0.193494	0.880945	0.35571	1140.28	9.20693	1137.6	16.9465	1132.51	46.1024	1132.51	46.1024	100.686
PF12-1-119	112.375	95406.1	2.32103	12.8657	0.82248	2.10218	1.20174	0.196156	0.87619	0.7291	1154.64	9.26256	1149.52	8.26901	1139.89	16.3496	1139.89	16.3496	101.294
PF12-1-8	54.9336	26888.9	0.859862	12.8626	2.22885	1.96558	2.28787	0.183365	0.516323	0.225678	1085.33	5.15748	1103.79	15.3984	1140.35	44.3421	1140.35	44.3421	95.1754
PF12-1-68	26.8674	13796.4	0.921885	12.8319	5.60076	1.9279	5.81313	0.179422	1.55691	0.267827	1063.81	15.2682	1090.81	38.8848	1145.12	111.401	1145.12	111.401	92.8997
PF12-1-51	49.6656	41209.4	1.60265	12.8261	2.93423	2.09056	3.94258	0.194472	2.6333	0.667912	1145.56	27.6377	1145.71	27.0856	1146.02	58.3073	1146.02	58.3073	99.9594
PF12-1-46	87.5034	62924.2	2.1869	12.812	1.15355	2.13854	1.35078	0.198715	0.702796	0.52029	1168.41	7.51039	1161.35	9.34577	1148.22	22.918	1148.22	22.918	101.759
PF12-1-48	25.4143	15872.6	2.26852	12.7975	5.0822	2.07448	5.20047	0.192545	1.10279	0.212056	1135.15	11.4781	1140.41	35.6442	1150.46	100.96	1150.46	100.96	98.6688
PF12-1-33	115.396	52776.9	1.69425	12.7927	1.3317	2.1366	3.21977	0.198237	2.93147	0.910458	1165.84	31.2643	1160.73	22.2735	1151.2	26.4403	1151.2	26.4403	101.272
PF12-1-60	42.4177	41326.9	1.51298	12.7889	2.99262	2.13317	3.25234	0.197861	1.27356	0.391582	1163.82	13.5609	1159.62	22.4874	1151.75	59.4431	1151.75	59.4431	101.047
PF12-1-47	118.848	72706.3	1.56725	12.7879	0.850678	2.16856	1.25157	0.201127	0.91803	0.733502	1181.37	9.90961	1171.02	8.69773	1151.91	16.8882	1151.91	16.8882	102.558
PF12-1-9	145.197	91863.1	1.31388	12.7808	0.592157	2.07846	0.778737	0.192663	0.505749	0.649447	1135.79	5.26664	1141.73	5.33867	1153.01	11.7534	1153.01	11.7534	98.5058
PF12-1-27	50.7167	44561.1	1.46603	12.7732	1.94164	2.16194	2.95238	0.200282	2.22409	0.753322	1176.83	23.9238	1168.89	20.4998	1154.2	38.536	1154.2	38.536	101.961
PF12-1-139	78.9539	45092	0.945507	12.77	1.56964	2.14842	1.84961	0.19898	0.978422	0.528987	1169.84	10.4675	1164.54	12.8162	1154.7	31.1576	1154.7	31.1576	101.311
PF12-1-130	100.857	37735.1	2.51753	12.7625	2.76667	2.06784	3.84404	0.191404	2.66873	0.694253	1128.97	27.6387	1138.22	26.3147	1155.87	54.9031	1155.87	54.9031	97.6734
PF12-1-77	40.7967	29144.2	1.74409	12.7489	1.7451	2.12552	2.14196	0.196533	1.24203	0.579855	1156.67	13.1511	1157.13	14.7916	1157.97	34.6044	1157.97	34.6044	99.8872
PF12-1-59	76.7464	36238.5	1.67647	12.7292	2.11949	2.15544	2.64933	0.198992	1.58956	0.599986	1169.9	17.0065	1166.8	18.3776	1161.04	42.0065	1161.04	42.0065	100.763
PF12-1-81	125.992	120944	3.25368	12.719	1.19406	2.13492	1.37288	0.19694	0.677514	0.493497	1158.86	7.18618	1160.18	9.4936	1162.63	23.6718	1162.63	23.6718	99.6761
PF12-1-30	47.4436	73848	1.17255	12.6873	2.98852	2.10333	3.19463	0.193541	1.12889	0.353371	1140.53	11.8006	1149.9	21.9886	1167.58	59.2058	1167.58	59.2058	97.6834
PF12-1-41	145.026	88800.2	1.08173	12.6788	0.99848	2.18381	1.20035	0.200813	0.66625	0.555044	1179.68	7.18243	1175.89	8.36021	1168.91	19.7772	1168.91	19.7772	100.922
PF12-1-19	163.887	122483	0.888449	12.6298	0.910966	2.16616	1.5289	0.19842	1.22787	0.80311	1166.83	13.1054	1170.25	10.6214	1176.61	18.0201	1176.61	18.0201	99.1689
PF12-1-133	75.5802	41323.1	1.49419	12.6075	1.1963	2.18341	1.37619	0.199648	0.680262	0.494308	1173.43	7.29804	1175.77	9.58439	1180.09	23.6534	1180.09	23.6534	99.4354
PF12-1-71	81.7722	69694.8	1.25109	12.5815	1.34098	2.33883	3.98444	0.213417	3.752	0.941664	1247	42.5409	1224.17	28.3474	1184.18	26.5116	1184.18	26.5116	105.305
PF12-1-50	49.9304	57641.1	1.0235	12.5787	2.55797	2.17654	2.79982	0.198565	1.13834	0.406575	1167.61	12.1571	1173.57	19.4817	1184.61	50.565	1184.61	50.565	98.5647
PF12-1-145	28.6658	18771.3	2.45169	12.5545	5.60276	2.17752	5.77724	0.198272	1.4091	0.243905	1166.03	15.0303	1173.89	40.2208	1188.42	110.721	1188.42	110.721	98.1164
PF12-1-78	50.8792	40563	3.89163	12.5357	2.38686	2.27731	2.56953	0.207047	0.951533	0.370313	1213.07	10.5217	1205.28	18.1316	1191.38	47.1218	1191.38	47.1218	101.821
PF12-1-17	40.6632	23396.9	2.07611	12.5029	2.73926	2.18134	2.99243	0.197803	1.20462	0.402556	1163.51	12.8238	1175.1	20.8367	1196.51	54.0379	1196.51	54.0379	97.2415
PF12-1-43	55.2982	40974.9	4.54205	12.4453	2.68314	2.24054	5.00584	0.202235	4.22602	0.844217	1187.32	45.8273	1193.83	35.1574	1205.62	52.8782	1205.62	52.8782	98.4819
PF12-1-67	96.5819	120390	1.2658	12.4139	0.802184	2.26327	1.23166	0.203771	0.934609	0.758819	1195.55	10.1988	1200.92	8.67393	1210.62	15.7755	1210.62	15.7755	98.7548
PF12-1-82	120.567	67219.1	0.90395	12.3947	0.999195	2.30766	1.18665	0.207446	0.640115	0.539431	1215.2	7.08948	1214.64	8.40647	1213.65	19.6683	1213.65	19.6683	100.127
PF12-1-87	67.5971	2147.97	2.73381	12.232	2.33433	2.22503	2.39747	0.197393	0.546582	0.227983	1161.3	5.80857	1188.96	16.7967	1239.61	45.7572	1239.61	45.7572	93.6827
PF12-1-80	49.5476	25167.2	1.78148	12.1657	2.49373	2.3801	2.60835	0.210005	0.764715	0.29318	1228.84	8.5558	1236.64	18.6513	1250.26	48.7946	1250.26	48.7946	98.2871
PF12-1-1	35.1768	24654.2	1.78552	11.7753	3.21753	2.61815	3.82672	0.223597	2.07155	0.541338	1300.85	24.403	1305.74	28.1239	1313.77	62.4155	1313.77	62.4155	99.0168
PF12-1-123	58.4155	48616.8	1.57711	11.6838	2.53499	2.70198	2.64627	0.228963	0.759343	0.286948	1329.06	9.11976	1329	19.614	1328.88	49.0731	1328.88	49.0731	100.013
PF12-1-131	43.7348	40395.9	2.63811	11.6061	4.08842	2.55114	4.28937	0.214743	1.2975	0.302492	1254.04	14.7864	1286.76	31.2988	1341.79	79.0031	1341.79	79.0031	93.4601
PF12-1-58	60.1235	58726	1.86779	11.5936	1.14599	2.73981	1.383	0.230376	0.774201	0.559799	1336.47	9.34482	1339.33	10.2881	1343.88	22.134	1343.88	22.134	99.4484
PF12-1-73	107.843	46156.9	2.21849	11.4785	0.891012	2.84008	1.50669	0.236437	1.21499	0.8064	1368.15	14.9774	1366.19	11.3152	1363.11	17.1635	1363.11	17.1635	100.369
PF12-1-42	105.541	100009	2.54965	11.3483	1.20295	2.86304	1.37302	0.235645	0.661873	0.482058	1364.02	8.13687	1372.24	10.3328	1385.05	23.1031	1385.05	23.1031	98.4811
PF12-1-18	69.4419	52552.6	2.69824	11.1996	0.874758	2.99588	1.94858	0.243348	1.74119	0.893571	1404.08	21.9686	1406.57	14.8351	1410.34	16.7409	1410.34	16.7409	99.556
PF12-1-112	35.3875	46055.9	2.8717	11.1776	3.53486	3.10354	3.72765	0.251597	1.18329	0.317436	1446.71	15.3339	1433.57	28.6338	1414.1	67.6352	1414.1	67.6352	102.306
PF12-1-132	42.7416	45786.5	1.38209	11.0825	2.41125	3.13134	8.02952	0.251691	7.65892	0.953845	1447.19	99.2867	1440.42	61.8722	1430.43	46.026	1430.43	46.026	101.172
PF12-1-65	69.5465	85207.2	0.513819	11.0655	1.47501	3.01397	1.91911	0.241886	1.22773	0.639739	1396.49	15.4152	1411.16	14.6327	1433.36	28.1414	1433.36	28.1414	97.4283
PF12-1-129	209.282	155422	2.80377	10.9357	0.300194	3.24369	0.547141	0.257267	0.457435	0.836046	1475.84	6.03398	1467.67	4.24646	1455.84	5.70969	1455.84	5.70969	101.374
PF12-1-134	213.236	171647	2.4611	10.8937	0.536731	3.23833	0.709569	0.255856	0.464121	0.654088	1468.6	6.09544	1466.38	5.50497	1463.15	10.1987	1463.15	10.1987	100.373
